1 **Title: Obesity associated with attenuated tissue immune cell responses in COVID-19**

2

3 **Authors:**

4 Shuang A. Guo<sup>1,2,3,4^</sup>, Georgina S. Bowyer<sup>1,3,4^</sup>, John R. Ferdinand<sup>1,3,4^</sup>, Mailis Maes<sup>3,4^</sup>, Zewen K.  
5 Tuong<sup>1,2,3,4^</sup>, Eleanor Gilman<sup>1,3,4</sup>, Mingfeng Liao<sup>5</sup>, Rik G. H. Lindeboom<sup>2</sup>, Masahiro Yoshida<sup>6</sup>,  
6 Kaylee Worlock<sup>6</sup>, Huda Gopee<sup>7</sup>, Emily Stephenson<sup>7</sup>, Paul A. Lyons<sup>3,4,8</sup>, Kenneth G.C. Smith<sup>3,4,8</sup>,  
7 Muzlifah Haniffa<sup>2,7</sup>, Kerstin B. Meyer<sup>2</sup>, Marko Z. Nikolic<sup>6</sup>, Zheng Zhang<sup>5</sup>, Richard G. Wunderink<sup>9</sup>,  
8 Alexander V. Misharin<sup>9</sup>, Gordon Dougan<sup>3,4,8</sup>, Vilas Navapurkar<sup>10</sup>, Sarah A. Teichmann<sup>2\*</sup>, Andrew  
9 Conway-Morris<sup>10,11\*</sup>, Menna R. Clatworthy<sup>1,2,3,4,8\*</sup>.

10

11

12 **Affiliations:**

13 <sup>1</sup>Molecular Immunity Unit, Department of Medicine, University of Cambridge, Cambridge, UK.

14 <sup>2</sup>Cellular Genetics, Wellcome Sanger Institute, Hinxton, UK.

15 <sup>3</sup>Cambridge Institute for Therapeutic Immunology and Infectious Disease, Jeffrey Cheah  
16 Biomedical Centre, University of Cambridge, Cambridge, CB2 0AW, UK.

17 <sup>4</sup>Department of Medicine, University of Cambridge, Cambridge Biomedical Campus, Cambridge,  
18 CB2 0QQ, UK

19 <sup>5</sup>Institute for Hepatology, National Clinical Research Center for Infectious Disease, Shenzhen  
20 Third People's Hospital, Shenzhen, China.

21 <sup>6</sup>UCL Respiratory, Division of Medicine, University College London, London, UK

22 <sup>7</sup>Biosciences Institute, Newcastle University, Newcastle upon Tyne, UK

23 <sup>8</sup>NIHR Cambridge Biomedical Research Centre, Cambridge, UK.

24 <sup>9</sup>Division of Pulmonary and Critical Care Medicine, Department of Medicine, Feinberg School of  
25 Medicine, Northwestern University, Chicago, IL, USA.

26 <sup>10</sup>John V Farman Intensive Care Unit, Addenbrooke's Hospital, Cambridge University Hospitals  
27 NHS Foundation Trust, Cambridge, UK

28 <sup>11</sup>Division of Anaesthesia, University of Cambridge Department of Medicine, Cambridge, UK.

29 <sup>^</sup>Equal contribution

30 <sup>\*</sup>Corresponding authors

31

## 32 **Abstract**

33 Obesity is common and associated with more severe COVID-19, proposed to be in part related to  
34 an adipokine-driven pro-inflammatory state. Here we analysed single cell transcriptomes from  
35 bronchiolar lavage in three adult cohorts, comparing obese (Ob, body mass index (BMI)  $>30\text{m}^2$ )  
36 and non-obese (N-Ob, BMI  $<30\text{m}^2$ ). Surprisingly, we found that Ob subjects had attenuated lung  
37 immune/inflammatory responses in SARS-CoV-2 infection, with decreased expression of  
38 interferon (IFN) $\alpha$ , IFN $\gamma$  and tumour necrosis factor (TNF) alpha response gene signatures in  
39 almost all lung epithelial and immune cell subsets, and lower expression of *IFNG* and *TNF* in  
40 specific lung immune cells. Analysis of peripheral blood immune cells in an independent adult  
41 cohort showed a similar, but less marked, reduction in type I IFN and IFN $\gamma$  response genes, as  
42 well as decreased serum IFN $\alpha$ , in Ob patients with SARS-CoV-2. Nasal immune cells from Ob  
43 children with COVID-19 also showed reduced enrichment of IFN $\alpha$  and IFN $\gamma$  response genes.  
44 Altogether, these findings show blunted tissue immune responses in Ob COVID-19 patients, with  
45 clinical implications.

46

## 47 **Main**

48 SARS-CoV-2 is a novel coronavirus responsible for the current global pandemic, with more than  
49 275 million cases and 5.3 million deaths confirmed worldwide (World Health Organisation, Dec  
50 24<sup>th</sup> 2021). The clinical course of SARS-CoV-2 is variable, ranging from asymptomatic disease to  
51 acute respiratory distress syndrome requiring ventilatory support<sup>1</sup>. Those at risk of a more severe  
52 clinical course following infection include the elderly, immunosuppressed, and those with co-  
53 morbidities including obesity<sup>1-4</sup>. Despite the expedited delivery of clinically validated SARS-CoV-  
54 2 vaccines, some 'vulnerable' groups mount poor vaccine responses, and emerging viral variants  
55 are poorly neutralised by vaccine-induced antibodies<sup>5</sup>. Thus, there is an on-going need to better  
56 understand viral immune responses in those at highest risk of severe disease, such as obese  
57 individuals.

58

59 Obesity, defined as a body mass index (BMI) of  $>30\text{m}^2$ , is common and affects more than 40% of  
60 US adults<sup>6</sup>. Whilst an increased BMI generates mechanical factors that may compromise  
61 ventilation<sup>7</sup>, obesity is also associated with an inflammatory state characterised by elevated  
62 circulating cytokines such as tumour necrosis factor (TNF) and interleukin (IL) 6<sup>8</sup>, chemokines,  
63 including the neutrophil recruiting chemokine CXCL8<sup>9</sup>, and the monocyte chemoattractant CCL2  
64 (MCP1) that mediates the accumulation of inflammatory adipose tissue macrophages<sup>10</sup>.  
65 Lymphocyte abnormalities have also been noted in obesity, and an increased frequency of  
66 circulating interferon (IFN)- $\gamma$  secreting CD4 T cells noted, the latter likely related to the known  
67 effects of leptin in promoting Th1 polarisation<sup>11</sup>. Indeed, the appetite-regulating hormone leptin,  
68 produced by adipocytes and increased in obesity, has several direct immune stimulatory effects,

69 promoting NK cell cytotoxicity, antigen presentation by dendritic cells (DC) and monocyte and B  
70 cell secretion of TNF and IL6 by engagement of the leptin receptor (LEPR) which is expressed on  
71 many immune cells, and principally acts by triggering JAK2/STAT3 signalling<sup>12</sup>. Leptin levels  
72 increase in lean animals challenged with pro-inflammatory cytokines, infectious agents or  
73 pathogen-derived molecules<sup>13</sup>, and in COVID-19, elevated serum leptin levels have been  
74 described in ventilated SARS-CoV-2 patients compared with controls<sup>14</sup>, with a positive correlation  
75 with BMI<sup>15</sup>.

76  
77 There has been an intense focus on delineating the nature of the immune response in SARS-  
78 CoV-2 infection; Type I IFN responses play a critical role in protective immunity, with genetic-  
79 deficiency or neutralising autoantibodies affecting this axis mediating increased susceptibility to  
80 severe infection<sup>16</sup>. Transcriptomic studies have identified both absent/low and increased IFN  
81 response genes in patients with severe or lethal disease, and longitudinal studies revealed a  
82 diminished and/or delayed induction of type I IFNs in COVID-19 patients compared with patients  
83 with influenza, with an exuberant early TNF/IL6 response<sup>16</sup>. To date, the effect of obesity on  
84 immune responses to SARS-CoV-2, particularly tissue responses, has not been considered,  
85 although it has been proposed that the elevated leptin associated with obesity might promote an  
86 excessive inflammatory response, contributing to the worse outcomes observed in obese patients  
87 with COVID-19, with calls for anti-inflammatory therapeutic strategies to be employed in this  
88 patient group<sup>17</sup>.

89  
90 Here we profiled paired blood and bronchoalveolar lavage (BAL) samples from 4 patients with  
91 severe COVID-19 requiring mechanical ventilation and intensive care treatment, and 4 control  
92 ventilated non-COVID-19 patients using flow cytometry and scRNAseq. To address the issue of  
93 whether patients with a high BMI have abnormal tissue immune responses to SARS-CoV-2, we  
94 integrated our scRNAseq data (UCAM) with two previous COVID-19 BAL scRNAseq datasets  
95 from Shenzhen 3<sup>rd</sup> Hospital, China (SZH) and Northwestern University, Chicago, USA (NU)<sup>18,19</sup>  
96 and obtained the BMI metadata associated with these samples, enabling a comparison of BAL  
97 immune cells in 13 obese (Ob) patients (BMI>30) and 20 non-obese (N-Ob) (BMI<30) COVID-19  
98 patients and ventilated non-COVID controls (**Fig. 1a, S1a**). Overall, Ob subjects were more  
99 prevalent in the NU cohort compared to the other two cohorts and underwent BAL sampling at  
100 earlier time-points following admission to the intensive care unit (**Fig. S1a**).

101  
102 Following QC, dataset integration and batch correction, data was available on 189,312 cells.  
103 Clusters were broadly annotated using canonical marker expression and comparison to previously  
104 published BAL single cell datasets, to identify alveolar type 1 and 2 pneumocytes (AT1/2), ciliated  
105 cells, B and plasma cells, classical and plasmacytoid dendritic cells (c/pDCs), a broad T cell/innate  
106 lymphocyte cluster and alveolar macrophages, including monocyte-derived and tissue-resident

107 clusters, with reasonable representation of cells from Ob and N-Ob patients in all clusters (**Fig.**  
108 **1b, S1b-c**).

109

110 Analysis of the non-immune cells in isolation enabled the identification of several ciliated epithelial  
111 cell subsets, as well as basal cells, club cells, squamous cells and alveolar type 1 and AT1/2 (**Fig.**  
112 **1c, S2a**). Organ structural cells may contribute to tissue immune responses, and indeed, several  
113 immune-related transcripts were highly expressed in some of these subsets; SARS-CoV-2-  
114 infected AT1/2 cells expressed neutrophil recruiting chemokine transcripts (*CXCL1*, *CXCL2* and  
115 *CXCL8*), but this was attenuated in Ob compared with N-Ob subjects (**Fig. S2b**). Consistent with  
116 this, flow cytometric analysis of the UCAM cohort BAL confirmed a reduction in neutrophils in Ob  
117 BAL compared with N-Ob BAL (**Fig. S2c**). *IL1RN* (encoding IL1RA, a protein that binds to IL1R  
118 inhibiting the pro-inflammatory effects of IL1 $\beta$ , including arterial inflammation<sup>20</sup>) was highly  
119 expressed in squamous epithelial cells in N-Ob, whilst barely detectably in Ob subjects (**Fig. S2b**).  
120 Conversely, GDF15 the pro-cachectic cytokine<sup>21</sup> was more highly expressed in Ob subjects across  
121 a range of airway cells (**Fig. S2b**). Surprisingly, given the association of obesity with inflammation,  
122 gene-set enrichment analysis (GSEA) demonstrated a marked negative enrichment of *interferon-*  
123 *alpha* and/or *interferon-gamma response genes* in all non-immune cell clusters in Ob compared  
124 with N-Ob COVID-19+ BAL, with more variable differences in these genesets in COVID-19  
125 negative patients (**Fig. 1d**).

126 Considering alveolar macrophages in isolation, four subsets of monocyte-derived macrophages  
127 (MoAM), and two subsets of tissue resident (TRAM1/2) macrophages were evident, as noted  
128 previously<sup>18,19</sup> (**Fig. 1e, S2d**). In Ob subjects with SARS-CoV-2 infection, all alveolar macrophage  
129 subsets showed reduced enrichment of *interferon-alpha* and/or *interferon-gamma response*  
130 *genes*, *Tnfa via NFkB*, *Inflammatory response*, and *complement pathway genes*, with reduced  
131 *JAK-STAT3 signalling pathway genes* also evident in MoAM1,2 and 4 compared with N-Ob  
132 COVID-19 (**Fig. 1f, S2e**), with a similar pattern observed in cDCs and pDCs in BAL (**Fig.S2f**).  
133 Indeed, a curated chemokine/cytokine gene module score was significantly higher in N-Ob  
134 alveolar macrophages, particularly in monocyte-derived AM subsets (**Fig. 1g**). Given the  
135 differences in timing of BAL sampling between groups, we plotted individual patient gene pathway  
136 enrichment scores against time (**Fig. S2g**). This confirmed that *interferon-alpha* and/or *interferon-*  
137 *gamma response genes* were reduced in Ob compared with N-Ob subjects, across timepoints,  
138 and in all AM subsets except TRAM2, which showed only an early attenuation of responses in Ob  
139 (**Fig. S2g**). Genes attenuated in Ob alveolar macrophages and cDCs included *CXCL10*, a  
140 classical IFN $\gamma$  response gene previously proposed to form a pro-inflammatory circuit with T cells<sup>19</sup>,  
141 and several monocyte and lymphocyte-recruiting chemokines (**Fig. S2h-i**). A notable exception to  
142 the muted cytokine and chemokine expression in Ob macrophages, cDCs and pDCs was *TGFB1*,  
143 a tissue repair factor, which in excess can contribute to fibrosis, which was broadly more highly  
144 expressed in Ob cells in COVID-19 (**Fig. S2h-i**). To validate these findings and confirm their

145 relevance across lifespan, we examined the single cell transcriptomes of tissue immune cells  
146 isolated from nasal brushings in children with SARS-CoV-2<sup>22</sup>. We similarly found reduced  
147 enrichment of *interferon-alpha* and/or *interferon-gamma response* genes in myeloid cells in Ob  
148 children compared with N-Ob (**Fig. 1h**).

149  
150 We next assessed T cells and innate lymphocytes in adult BAL, annotating naïve and effector  
151 memory CD4 and CD8 subsets, Tregs, MAIT cells, NKT and two subsets of NK cells, CD56<sup>high</sup>  
152 and CD56<sup>low</sup> (**Fig. 2a, S3a**). GSEA again demonstrated reduced enrichment of *interferon-alpha*  
153 and/or *interferon-gamma response* genes, and *Tnfa signalling via NFkB*, pathway genes across  
154 every subset present in Ob BAL (**Fig. 2b, S3b-c**). In Ob children with SARS-CoV-2, nasal T cells  
155 and innate lymphocytes cells also showed reduced enrichment of *interferon-alpha* and/or  
156 *interferon-gamma response* genes compared with N-Ob (**Fig. 2c, S3d**).

157 In adult BAL, predictive cell-cell interaction analysis based on receptor-ligand expression  
158 suggested reduced alveolar macrophage production of chemokines (*CCL7, CCL8*) predicted to  
159 attract CD8 T and NK cell subsets in Ob subjects (**Fig. 2d**), both important for anti-viral immunity.  
160 Few predicted interactions were increased in Ob patients, notably IL10-IL10R (MoMAC3/4 and  
161 NKCD56<sup>hi</sup>) with the potential to suppress NK cell cytotoxicity<sup>23</sup>, and TNFSF14-TNFRSF14  
162 (MoMAC1/3 and naïve CD8 T cells) (**Fig. 2d**), encoding LIGHT-HVEM, an axis important for  
163 stimulating lymphocytes, but high serum LIGHT levels have been associated with fatal COVID-  
164 19<sup>24</sup>.

165 B cell and plasma cells clusters in adult BAL included naïve B cells, memory B cells, exhausted B  
166 cells and plasma cells. (**Fig. 2e, S4a-b**). In COVID-19, there was again reduced enrichment of  
167 *interferon-alpha* and/or *interferon-gamma response* and *Tnfa signalling via NFkB* pathway genes  
168 in all BAL B cell subsets in Ob subjects, with more variable effects in the paediatric samples (**Fig.**  
169 **2f, S4c-d**).

170  
171 To determine if blunted immune responses were evident in Ob subjects beyond tissue immune  
172 cells, we obtained BMI data (where available) on an additional cohort of adult COVID-19 patients  
173 recently included in a multiomic analysis of PBMCs<sup>25</sup>. In this cohort, patient's blood was sampled  
174 between day 0 and 20 post-symptom onset, with a similar temporal distribution of sampling in Ob  
175 and Non-Ob (**Fig. S5a**). As observed in adult BAL, there was reduced enrichment of *interferon-*  
176 *alpha* and/or *interferon-gamma response genes* in peripheral blood T cells, innate lymphocytes  
177 and B cells in Ob COVID-19 patients compared with N-Ob (**Fig. S5b-c**). Interestingly, *Tnfa*  
178 *signalling via NFkB* pathway genes showed the opposite enrichment pattern to that observed in  
179 BAL, with an increase in Ob COVID-19 patients (**Fig. S5b-c**).

180  
181 We reasoned that the reduced tissue cell responses to IFN $\alpha$ , IFN $\gamma$  and TNF $\alpha$  might be due to a  
182 decreased production of these cytokines, or a reduced ability to respond to them due to decreased



183 receptor expression. To distinguish between these possibilities, we first assessed cytokine  
184 transcripts in BAL cells; *IFNA1/2* and *IFNB* transcripts were undetectable, except in <0.5% of  
185 MoAM3 in N-Ob COVID-19+ subjects (**Fig. 2g, S6**). There was little expression of type I IFN  
186 transcripts in peripheral blood immune cells (**Fig. S7**), but serum cytokine measurement showed  
187 undetectable IFN $\alpha$  levels in Ob but elevated levels in N-Ob subjects (**Fig. 2h**), with no significant  
188 differences in TNF (which was undetectable) and IFN $\gamma$  (data not shown). *IFNAR1/2* expression  
189 was not decreased in Ob versus N-Ob COVID-19 BAL cells, with an increase in *IFNAR1* in some  
190 alveolar macrophage subsets in Ob COVID-19 (**Fig. 2g, S6**). Altogether, this is consistent with a  
191 failure of type I IFN production rather than a reduced ability to respond to type I IFNs in Ob subjects  
192 in COVID-19. In SARS-CoV-2 infected patients, *IFNG* transcripts were detectable in proliferating  
193 lymphocytes, CD4 central memory T cells, naïve CD8 T cells and NKT cells in BAL, again mainly  
194 at a higher level in N-Ob compared with Ob patients (**Fig. S6**). In BAL, *TNF* transcripts were  
195 highest in N-Ob COVID-19+ MoAM3, TRAM2, and cDC (**Fig. 2g, S6**), but in blood, the opposite  
196 was observed, with higher *TNF* and lower *TNFRSF1A/B* expression in some subsets of Ob  
197 circulating monocytes (**Fig. S8**).

198  
199 Obese patients are known to have basal immune activation and inflammation, in part due to the  
200 immunostimulatory effects of elevated leptin. It has been proposed that this contributes to the  
201 increased susceptibility to severe SARS-CoV-2 infection and the worse outcomes observed in  
202 obese subjects, generating a heightened pro-inflammatory cytokine response. In fact, our analysis  
203 of Ob adult BAL and Ob paediatric nasal immune cells in COVID-19 suggests that these patients  
204 exhibit a broadly immunosuppressed state in tissues compared with non-obese subjects, with  
205 reduced type I IFN and IFN gamma signatures across almost all immune cell subsets, as well as  
206 decreased expression of monocyte and neutrophil recruiting chemokines. Of note, our findings  
207 bare similarity to studies of obese mice challenged with influenza, which not only had increased  
208 mortality, but decreased *Ifna*, *Ifnb* and *Ifng* transcripts in lung tissue, as well as lower levels of  
209 some chemokines (*Ccl2* and *Ccl5*), compared with lean controls, despite a higher viral load<sup>13,26</sup>.  
210 In addition, these obese animals also had impaired antigen presentation by DC, decreased IFN- $\gamma$   
211 production by memory T cells, and reduced NK cell cytotoxicity in this model<sup>27</sup>. Interestingly, serum  
212 leptin concentrations increased in lean mice during influenza infection, in contrast to obese mice,  
213 where leptin decreased, such that during infection levels were similar to lean mice<sup>13</sup> but leptin  
214 resistance in the latter contributing to attenuated immune cell responses<sup>28</sup>. Consistent with this, in  
215 COVID-19 BAL, we observed reduced *JAK-STAT3 signalling* pathway genes in a number of lung  
216 immune cell subsets in Ob subjects, particularly in monocyte-derived alveolar macrophages.  
217 Notably, although IFN response genes were reduced in Ob subjects in peripheral blood, this  
218 phenomenon was much less marked outside of tissues and there was a disconnect between BAL  
219 and blood in terms of TNF response genes, suggesting attenuated tissue responses, but a more

220 exuberant, potentially pathogenic systemic pro-inflammatory landscape, and emphasising the  
221 importance of studies assessing tissue immunity, despite the practical challenges associated.

222

223 Overall, our study has important translational implications; current and proposed treatments for  
224 severe COVID-19 include anti-inflammatory agents such as IL6R blocking antibodies and the  
225 application of recombinant IFN $\alpha$  and IFN $\beta$  to promote early anti-viral responses, with the latter  
226 showing limited efficacy in an early trial<sup>29</sup>. However, this study was small and included only patients  
227 with mild disease, and there is an increasing recognition for the need to tailor the different  
228 treatment strategies available to the correct patient group, at the correct time<sup>16</sup>. Our data show a  
229 markedly muted response to type I IFN and IFN $\gamma$  in tissue immune cells in the respiratory tract in  
230 Ob COVID-19 patients across lifespan, as well as reduced transcripts of these cytokines,  
231 supporting the application of locally-delivered, inhaled recombinant type I IFNs to respiratory tract  
232 tissues in this vulnerable subset.

233

234

235

#### 236 **Acknowledgements:**

237 GB is funded by a Wellcome Strategic Scientific award (WT211276/Z/18/Z). ZKT and MRC are  
238 supported by a Medical Research Council Research Project Grant (MR/S035842/1). JRF and  
239 MRC are supported by the National Institute of Health Research (NIHR) Blood and Transplant  
240 Research Unit in Organ Donation, and NR, MM, GD and MRC by the NIHR Cambridge Biomedical  
241 Research Centre. MZN acknowledges funding from the Rutherford Fund Fellowship allocated by  
242 the Medical Research Council and the UK Regenerative Medicine Platforms 2 (MR/5005579/1).  
243 KBM acknowledges funding from Wellcome (WT211276/Z/18/Z and Sanger core grant  
244 WT206194), the Chan Zuckerberg Foundation (grants 2017-174169 and 2019-202654) and the  
245 European Union's Horizon 2020 research and innovation programme under grant agreement No  
246 874656. The views expressed are those of the author(s) and not necessarily those of the NHS,  
247 the NIHR or the Department of Health and Social Care. The CL3 for this research was partly  
248 funded by the NIHR AMR Research Capital Funding Scheme [NIHR200640]. We are grateful to  
249 the Evelyn Trust (20/75), Addenbrooke's Charitable Trust, Cambridge University Hospitals  
250 (12/20A), the NIHR Cambridge Biomedical Research Centre, Rosetrees Trust (M944), Action  
251 Medical Research (GN2911) and the UKRI/NIHR through the UK Coronavirus Immunology  
252 Consortium (UK-CIC) for their financial support. RGW and AVM are funded by NIH NIAID  
253 U19AI35964. ACM is supported by a Clinician Scientist Fellowship from the Medical Research  
254 Council (MR/V006118/1). MRC and SAG by an NIHR Research Professorship RP-2017-08-ST2-  
255 002).

256

257

258 **References**

- 259 1. Guan, W.J., *et al.* Clinical Characteristics of Coronavirus Disease 2019 in China. *N. Engl.*  
260 *J. Med.* (2020).
- 261 2. Williamson, E.J., *et al.* Factors associated with COVID-19-related death using  
262 OpenSAFELY. *Nature* **584**, 430-436 (2020).
- 263 3. Tartof, S.Y., *et al.* Obesity and Mortality Among Patients Diagnosed With COVID-19:  
264 Results From an Integrated Health Care Organization. *Ann. Intern. Med.* **173**, 773-781  
265 (2020).
- 266 4. Anderson, M.R., *et al.* Body Mass Index and Risk for Intubation or Death in SARS-CoV-2  
267 Infection : A Retrospective Cohort Study. *Ann. Intern. Med.* **173**, 782-790 (2020).
- 268 5. Collier, D.A., *et al.* Sensitivity of SARS-CoV-2 B.1.1.7 to mRNA vaccine-elicited antibodies.  
269 *Nature* **593**, 136-141 (2021).
- 270 6. Hales, C.M., Carroll, M.D., Fryar, C.D. & Ogden, C.L. Prevalence of Obesity and Severe  
271 Obesity Among Adults: United States, 2017-2018. *NCHS Data Brief*, 1-8 (2020).
- 272 7. Dixon, A.E. & Peters, U. The effect of obesity on lung function. *Expert Rev. Respir. Med.*  
273 **12**, 755-767 (2018).
- 274 8. Kern, P.A., Ranganathan, S., Li, C., Wood, L. & Ranganathan, G. Adipose tissue tumor  
275 necrosis factor and interleukin-6 expression in human obesity and insulin resistance. *Am.*  
276 *J. Physiol. Endocrinol. Metab.* **280**, E745-751 (2001).
- 277 9. Strackowski, M., *et al.* Plasma interleukin-8 concentrations are increased in obese  
278 subjects and related to fat mass and tumor necrosis factor-alpha system. *J. Clin.*  
279 *Endocrinol. Metab.* **87**, 4602-4606 (2002).
- 280 10. Kanda, H., *et al.* MCP-1 contributes to macrophage infiltration into adipose tissue, insulin  
281 resistance, and hepatic steatosis in obesity. *J. Clin. Invest.* **116**, 1494-1505 (2006).
- 282 11. Lord, G.M., *et al.* Leptin modulates the T-cell immune response and reverses starvation-  
283 induced immunosuppression. *Nature* **394**, 897-901 (1998).
- 284 12. Naylor, C. & Petri, W.A., Jr. Leptin Regulation of Immune Responses. *Trends Mol. Med.*  
285 **22**, 88-98 (2016).
- 286 13. Smith, A.G., Sheridan, P.A., Harp, J.B. & Beck, M.A. Diet-induced obese mice have  
287 increased mortality and altered immune responses when infected with influenza virus. *J.*  
288 *Nutr.* **137**, 1236-1243 (2007).
- 289 14. van der Voort, P.H.J., *et al.* Leptin levels in SARS-CoV-2 infection related respiratory  
290 failure: A cross-sectional study and a pathophysiological framework on the role of fat  
291 tissue. *Heliyon* **6**, e04696 (2020).
- 292 15. Wang, J., *et al.* Leptin correlates with monocytes activation and severe condition in COVID-  
293 19 patients. *J. Leukoc. Biol.* **110**, 9-20 (2021).
- 294 16. Kim, Y.M. & Shin, E.C. Type I and III interferon responses in SARS-CoV-2 infection. *Exp.*  
295 *Mol. Med.* **53**, 750-760 (2021).
- 296 17. Andrade, F.B., *et al.* The Weight of Obesity in Immunity from Influenza to COVID-19. *Front*  
297 *Cell Infect Microbiol* **11**, 638852 (2021).
- 298 18. Liao, M., *et al.* Single-cell landscape of bronchoalveolar immune cells in patients with  
299 COVID-19. *Nat. Med.* **26**, 842-844 (2020).
- 300 19. Grant, R.A., *et al.* Circuits between infected macrophages and T cells in SARS-CoV-2  
301 pneumonia. *Nature* **590**, 635-641 (2021).
- 302 20. Nicklin, M.J., Hughes, D.E., Barton, J.L., Ure, J.M. & Duff, G.W. Arterial inflammation in  
303 mice lacking the interleukin 1 receptor antagonist gene. *J. Exp. Med.* **191**, 303-312 (2000).
- 304 21. Johnen, H., *et al.* Tumor-induced anorexia and weight loss are mediated by the TGF-beta  
305 superfamily cytokine MIC-1. *Nat. Med.* **13**, 1333-1340 (2007).



- 306 22. Yoshida, M., *et al.* Local and systemic responses to SARS-CoV-2 infection in children and  
307 adults. *Nature* (2021).
- 308 23. Littwitz-Salomon, E., Malyskina, A., Schimmer, S. & Dittmer, U. The Cytotoxic Activity of  
309 Natural Killer Cells Is Suppressed by IL-10(+) Regulatory T Cells During Acute Retroviral  
310 Infection. *Front. Immunol.* **9**, 1947 (2018).
- 311 24. Perlin, D.S., *et al.* Levels of the TNF-Related Cytokine LIGHT Increase in Hospitalized  
312 COVID-19 Patients with Cytokine Release Syndrome and ARDS. *mSphere* **5**(2020).
- 313 25. Stephenson, E., *et al.* Single-cell multi-omics analysis of the immune response in COVID-  
314 19. *Nat Med* (2021).
- 315 26. Easterbrook, J.D., *et al.* Obese mice have increased morbidity and mortality compared to  
316 non-obese mice during infection with the 2009 pandemic H1N1 influenza virus. *Influenza*  
317 *Other Respir Viruses* **5**, 418-425 (2011).
- 318 27. Smith, A.G., Sheridan, P.A., Tseng, R.J., Sheridan, J.F. & Beck, M.A. Selective impairment  
319 in dendritic cell function and altered antigen-specific CD8+ T-cell responses in diet-induced  
320 obese mice infected with influenza virus. *Immunology* **126**, 268-279 (2009).
- 321 28. Karlsson, E.A., Sheridan, P.A. & Beck, M.A. Diet-induced obesity impairs the T cell  
322 memory response to influenza virus infection. *J. Immunol.* **184**, 3127-3133 (2010).
- 323 29. Monk, P.D., *et al.* Safety and efficacy of inhaled nebulised interferon beta-1a (SNG001) for  
324 treatment of SARS-CoV-2 infection: a randomised, double-blind, placebo-controlled,  
325 phase 2 trial. *Lancet Respir Med* **9**, 196-206 (2021).
- 326 30. Morse, C., *et al.* Proliferating SPP1/MERTK-expressing macrophages in idiopathic  
327 pulmonary fibrosis. *Eur. Respir. J.* **54**(2019).
- 328 31. Hao, Y., *et al.* Integrated analysis of multimodal single-cell data. *Cell* **184**, 3573-  
329 3587.e3529 (2021).
- 330 32. Young, M.D. & Behjati, S. SoupX removes ambient RNA contamination from droplet-based  
331 single-cell RNA sequencing data. *Gigascience* **9**(2020).
- 332 33. McGinnis, C.S., Murrow, L.M. & Gartner, Z.J. DoubletFinder: Doublet Detection in Single-  
333 Cell RNA Sequencing Data Using Artificial Nearest Neighbors. *Cell Syst* **8**, 329-337.e324  
334 (2019).
- 335 34. Korsunsky, I., *et al.* Fast, sensitive and accurate integration of single-cell data with  
336 Harmony. *Nat Methods* **16**, 1289-1296 (2019).
- 337 35. McInnes, L., Healy, J. & Melville, J. UMAP: Uniform Manifold Approximation and Projection  
338 for Dimension Reduction. *J Open Source Softw* **3**, 861 (2018).
- 339 36. Wu, T., *et al.* clusterProfiler 4.0: A universal enrichment tool for interpreting omics data.  
340 *Innovation (N Y)* **2**, 100141 (2021).
- 341 37. Efremova, M., Vento-Tormo, M., Teichmann, S.A. & Vento-Tormo, R. CellPhoneDB:  
342 inferring cell-cell communication from combined expression of multi-subunit ligand-  
343 receptor complexes. *Nat. Protoc.* **15**, 1484-1506 (2020).
- 344  
345

346 **Figure legends**

347

348 **Figure 1. Single-cell analysis of bronchoalveolar lavage (BAL) fluid samples from patients**  
349 **with or without COVID-19 reveals differences in geneset enrichment in structural and**  
350 **myeloid cells in non-obese compared with obese subjects.**

351 a. Overview of the workflow. In this study, we included BAL samples from 33 patients from three  
352 cohorts with BMI information, namely UCAM (n=8; ob=3; this study), SZH (n=13; ob=1; Liao et al.,  
353 2020), and NU (n=12; ob=9; Grant et al., 2021).

354 b. UMAP embedding of 189,312 cells post-integration of the 3 datasets. Cells are coloured  
355 according to harmonised broad cell type annotations.

356 c. UMAP embedding of 4,989 epithelial and structural cells post-integration coloured according to  
357 harmonised fine cell type annotations.

358 d. Dot plot of gene set enrichment analysis of top 5 most enriched immune pathways within  
359 Hallmark gene sets for epithelial/structural cells. Mean expression of genes contained in each  
360 gene set within each cell type (labelled A-I; see c.), separated into non-obese vs. obese groups,  
361 are indicated by colour gradients. P values are indicated by dot sizes.

362 e. UMAP embedding of 122,928 myeloid cells coloured according to fine cell type annotation as  
363 per Grant et al. (2021). MoAM indicates monocyte-derived macrophage, TRAM indicates tissue-  
364 resident macrophage

365 f. Dot plot of gene set enrichment analysis of top 5 most enriched immune pathways within  
366 Hallmark gene sets for myeloid cells. Mean expression of genes contained in each gene set within  
367 each cell type (labelled A-F; see e.), separated into non-obese vs. obese groups, are indicated by  
368 colour gradients. P values are indicated by dot sizes.

369 g. Violin plot depicting mean expression levels of transcripts for cytokines and chemokines in each  
370 macrophage subpopulation. Differences between Non-obese vs. Obese with or without COVID-  
371 19 infection remain significant by Wilcoxon rank sum test.

372 h. Dot plot of gene set enrichment analysis of Hallmark gene sets in myeloid cells from paediatric  
373 airway samples (Yoshida et al. (2021)) between non-obese vs. obese children. Normalized  
374 enrichment score (NES) of each pathway is indicated by dot size. Colour of circles indicate which  
375 comparison was significantly enriched (healthy or COVID-19); grey circles are not significant.

376

377 **Figure 2. Single-cell analysis of lymphocytes shows reduced enrichment of type I and**  
378 **gamma interferon response genes in obese COVID-19 patients.**

379 a. UMAP embedding of 34,703 T/NK cells post-integration. CD4 T cells (Tcm: central memory T  
380 cells; Tem: effector memory T cells; Tnaive: naive T cells; and Treg), CD8 T cells (Tem, Tnaive,  
381 and MAIT), NKT cells, and NK cells (CD56-high or CD56-low).

382 b. Dot plot of gene set enrichment analysis of top 5 most enriched immune pathways within  
383 Hallmark gene sets for T/NK cells. Mean expression of genes contained in each gene set within

384 each cell type (labelled A-J; see a.), separated into non-obese vs obese groups, are indicated by  
385 colour gradients. P values are indicated by dot sizes.

386 c. Dot plot of gene set enrichment analysis of Hallmark gene sets in T/NK/ILC cells from paediatric  
387 airway samples (Yoshida et al. (2021)) between non-obese vs. obese children. Normalized  
388 enrichment score (NES) of each pathway is indicated by dot size. Colour of circles indicate which  
389 comparison was significantly enriched (healthy or COVID-19); grey circles are not significant.

390 d. Ligand-receptor analysis with CellPhoneDB infers distinct interactions between CD8.Tem /  
391 CD8.Tnaive / NK.CD56hi and alveolar macrophages. Size and colour gradient of circles indicate  
392 the scaled interaction score; interaction scores are scaled row-wise. Red outline indicates a P  
393 value < 0.05.

394 e. UMAP embedding of 8,857 B/plasma cells post-integration coloured according to harmonised  
395 fine cell type annotations.

396 f. Dot plot of gene set enrichment analysis of top 5 most enriched immune pathways within  
397 Hallmark gene sets for B/plasma cells. Mean expression of genes contained in each gene set  
398 within each cell type (labelled A-J; see e.), separated into non-obese vs. obese groups, are  
399 indicated by colour gradients. P values are indicated by dot sizes.

400 g. Mean expression dot plots of transcripts for IFN- $\alpha$ / $\beta$ / $\gamma$ , IFN receptors, IL6, and TNF- $\alpha$  in myeloid  
401 cells in the BAL samples. Expression levels in each case are indicated by distinct colour gradients  
402 (Green: Non-obese without COVID-19; Yellow: Non-obese with COVID-19; Purple: Obese without  
403 COVID-19; Magenta: Obese with COVID-19). Expression percentages are indicated by dot sizes.

404 h. Serum IFN- $\alpha$  measurements from n=4 obese and n=4 Non-obese patients from the adult PBMC  
405 patient cohort (Stephenson et al.). All 4 Obese samples were below detection limits.

406

407

#### 408 **Figure S1 – Patient sampling and cellular composition of BAL**

409 a. Distribution of patient's days from ICU admission to BAL sampling between obese (BMI>30)  
410 and non-obese (BMI<30) groups. Wilcoxon rank sum test where  $p < 0.05$  was considered  
411 statistically significant.

412 b. Mean expression dot plot of transcripts for canonical marker genes in each major population in  
413 the BAL samples. Expression levels are indicated by colour gradients. Expression percentages  
414 are indicated by dot sizes.

415 c. Proportions of each major population in each cohort grouped by infection (COVID+/-) and  
416 obesity (Non-Obese/Obese) states. Each bar indicates the cell type proportions in an individual  
417 sample.

418 d. Proportions of each major population in each cohort contributed by each sample (indicated by  
419 colour codes) (Black: NU; Gray: SZH; Light Gray: UCAM). Each bar indicates a cell type.

420

#### 421 **Figure S2 - Structural cells and myeloid cells in the BAL samples**

- 422 a. Mean expression dot plot of transcripts for canonical marker genes in each epithelial  
423 subpopulation in the BAL samples. Expression levels are indicated by colour gradients.  
424 Expression percentages are indicated by dot sizes.
- 425 b. Mean expression dot plot of the top differentially expressed cytokines and chemokines in each  
426 epithelial subpopulation in the COVID+ BAL samples. Expression levels in each case are indicated  
427 by distinct colour gradients (Blue: Non-obese; Magenta: Obese). Expression percentages are  
428 indicated by dot sizes.
- 429 c. Flow cytometry quantification of alveolar macrophages (SSC<sup>hi</sup>CD206<sup>+</sup>, left) and neutrophils  
430 (SSC<sup>hi</sup>CD206<sup>-</sup>CD24<sup>+</sup>CD16<sup>+</sup>, right) as a proportion of live CD45<sup>+</sup> cells in the BAL fluid of obese and  
431 non-obese SARS-CoV-2 positive/negative patients (n=6 patients from the Cambridge study only).
- 432 d. Mean expression dot plot of transcripts for canonical marker genes in each macrophage  
433 subpopulation in the BAL samples. Expression levels are indicated by colour gradients.  
434 Expression percentages are indicated by dot sizes. MoAM: Monocyte-derived alveolar  
435 macrophage; TRAM: Tissue-resident alveolar macrophage.
- 436 e. Dot plot of gene set enrichment analysis of most enriched immune pathways within Hallmark  
437 gene sets for each macrophage subpopulation. Mean expression of genes contained in each gene  
438 set within each cell type, separated into non-obese vs. obese and COVID- vs. COVID+ groups,  
439 are indicated by colour gradients. P values are indicated by dot sizes.
- 440 f. Dot plot of gene set enrichment analysis of most enriched immune pathways within Hallmark  
441 gene sets for classical dendritic cells (cDC) and plasmacytoid dendritic cells (pDC). Mean  
442 expression of genes contained in each gene set within each cell type, separated into non-obese  
443 vs. obese and COVID- vs. COVID+ groups, are indicated by colour gradients. P values are  
444 indicated by dot sizes.
- 445 g. Scatter plot of mean expression levels (y-axis) of the leading-edge genes in the signaling  
446 pathways IFN $\alpha$  Response, IFN $\gamma$  Response, and TNF $\alpha$  Signaling via NF- $\kappa$ B versus days from ICU  
447 admission to BAL sampling (x-axis) across macrophage subpopulations. MoAM, monocyte-  
448 derived alveolar macrophage; TRAM, tissue-resident alveolar macrophage.
- 449 h. Mean expression dot plot of the top differentially expressed cytokines and chemokines in each  
450 macrophage subpopulation in the COVID+ BAL samples. Expression levels in each case are  
451 indicated by distinct colour gradients (Blue: Non-obese; Magenta: Obese). Expression  
452 percentages are indicated by dot sizes.
- 453 i. Mean expression dot plots of transcripts for the top differentially expressed cytokines and  
454 chemokines in each dendritic cell subpopulation in the BAL samples. Expression levels in each  
455 case are indicated by distinct colour gradients (Green: Non-obese without COVID-19; Yellow:  
456 Non-obese with COVID-19; Purple: Obese without COVID-19; Magenta: Obese with COVID-19).  
457 Expression percentages are indicated by dot sizes.

458

459 **Figure S3 - T cells and NK cells in the BAL samples**

- 460 a. Mean expression dot plot of transcripts for canonical marker genes in each T/NK subpopulation  
461 in the BAL samples. Expression levels are indicated by colour gradients. Expression percentages  
462 are indicated by dot sizes. Tcm: central memory T cells; Tem: effector memory T cells; Tnaive:  
463 naive T cells; Treg: regulatory T cells; MAIT: mucosal associated invariant T cells.
- 464 b. Dot plot of gene set enrichment analysis of most enriched immune pathways within Hallmark  
465 gene sets for each T/NK subpopulation. Mean expression of genes contained in each gene set  
466 within each cell type, separated into non-obese vs. obese and COVID- vs. COVID+ groups, are  
467 indicated by colour gradients. P values are indicated by dot sizes.
- 468 c. Scatter plot of mean expression levels (y-axis) of the leading-edge genes in the signaling  
469 pathways IFN $\alpha$  Response, IFN $\gamma$  Response, and TNF $\alpha$  Signaling via NF- $\kappa$ B versus days from ICU  
470 admission to BAL sampling (x-axis) across T or NK subpopulations.
- 471 d. Mean expression dot plot of the top differentially expressed cytokines and chemokines in each  
472 T/NK subpopulation in the COVID+ BAL samples. Expression levels in each case are indicated  
473 by distinct colour gradients (Blue: Non-obese; Magenta: Obese). Expression percentages are  
474 indicated by dot sizes.

475

#### 476 **Figure S4 - B cells and plasma cells in the BAL samples**

- 477 a. Mean expression dot plot of transcripts for canonical marker genes in each B/Plasma  
478 subpopulation in the BAL samples. Expression levels are indicated by colour gradients.  
479 Expression percentages are indicated by dot sizes.
- 480 b. Heatmap of Pearson's correlation analysis between our annotated cell types and the public data  
481 from Monaco et al. 2019
- 482 c. Dot plot of gene set enrichment analysis of most enriched immune pathways within Hallmark  
483 gene sets for each B/Plasma subpopulation. Mean expression of genes contained in each gene  
484 set within each cell type, separated into non-obese vs. obese and COVID- vs. COVID+ groups,  
485 are indicated by colour gradients. P values are indicated by dot sizes.
- 486 d. Scatter plot of mean expression levels (y-axis) of the leading-edge genes in the signaling  
487 pathways IFN $\alpha$  Response, IFN $\gamma$  Response, and TNF $\alpha$  Signaling via NF- $\kappa$ B versus days from ICU  
488 admission to BAL sampling (x-axis) across B subpopulations and plasma cells.
- 489 e. Dot pot of gene set enrichment analysis of Hallmark gene sets in B/Plasma cells from paediatric  
490 airway samples (Yoshida et al. (2021)) between non-obese vs. obese children. Normalized  
491 enrichment score (NES) of each pathway is indicated by dot size. Colour of circles indicate which  
492 comparison was significantly enriched (healthy or COVID-19); grey circles are not significant.

493

#### 494 **Figure S5 – Validation of the signaling pathways in PBMC samples**

- 495 a. Sample demographics of Stephenson et al. 2021<sup>22</sup> PBMC samples used in this study.
- 496 b. Dot plot of gene set enrichment analysis of most enriched immune pathways within Hallmark  
497 gene sets for each T/NK/ILC subpopulation in PBMCs. Mean expression of genes contained in



498 each gene set within each cell type, separated into non-obese vs. obese groups, are indicated by  
499 colour gradients. P values are indicated by dot sizes.

500 d. Dot plot of gene set enrichment analysis of most enriched immune pathways within Hallmark  
501 gene sets for each B/Plasma subpopulation in PBMCs. Mean expression of genes contained in  
502 each gene set within each cell type, separated into non-obese vs. obese groups, are indicated by  
503 colour gradients. P values are indicated by dot sizes.

504

505 **Figure S6 – Expression patterns of the selected cytokines and their receptors in the BAL**  
506 **samples.**

507 a. Mean expression dot plots of transcripts for the selected cytokines and their receptors in each  
508 major population in the BAL samples. Expression levels in each case are indicated by distinct  
509 colour gradients (Green: Non-obese without COVID-19; Yellow: Non-obese with COVID-19;  
510 Purple: Obese without COVID-19; Magenta: Obese with COVID-19). Expression percentages are  
511 indicated by dot sizes.

512 b. Mean expression dot plots of transcripts for the selected cytokines in each T/NK subpopulation  
513 in the BAL samples. Expression levels in each case are indicated by distinct colour gradients  
514 (Green: Non-obese without COVID-19; Yellow: Non-obese with COVID-19; Purple: Obese without  
515 COVID-19; Magenta: Obese with COVID-19). Expression percentages are indicated by dot sizes.

516

517 **Figure S7 – Expression patterns of the selected cytokines and their receptors in PBMCs**

518 a. Mean expression dot plots for IFNA1, IFNA2, IFNB and IFNG in PBMC cell clusters from  
519 Stephenson et al. 2021<sup>22</sup> grouped according to BMI status. Size of circles correspond to fraction  
520 of cells expressing each gene and increasing gradient from purple to yellow corresponds to  
521 increasing mean expression value (standardized to 0 to 1 per gene).

522 b. Mean expression dot plots for IFNAR1, IFNAR2, IFNGR1 and IFNGR2 in PBMC cell clusters  
523 from<sup>22</sup> grouped according to BMI status. Size of circles correspond to fraction of cells expressing  
524 each gene and increasing gradient from purple to yellow corresponds to increasing mean  
525 expression value (standardized to 0 to 1 per gene).

526

527 **Figure S8 – Expression patterns of the selected cytokines and their receptors in PBMCs**

528 a. Mean expression dot plots for TNF and IL6 in PBMC cell clusters from Stephenson et al. 2021  
529 <sup>22</sup> grouped according to BMI status. Size of circles correspond to fraction of cells expressing each  
530 gene and increasing gradient from purple to yellow corresponds to increasing mean expression  
531 value (standardized to 0 to 1 per gene).

532 b. Mean expression dot plots for TNFRSF1A, TNFRSF1B and IL6R in PBMC cell clusters from<sup>22</sup>  
533 grouped according to BMI status. Size of circles correspond to fraction of cells expressing each  
534 gene and increasing gradient from purple to yellow corresponds to increasing mean expression  
535 value (standardized to 0 to 1 per gene).

## 536 **Methods**

537

### 538 **Patient recruitment and consent**

539 The BAL samples from UCAM were collected in the Addenbrookes Hospital Intensive Care Unit  
540 under our discard lavage protocol. The use of discard samples surplus to that required for clinical  
541 testing, and anonymised data review were conducted under the consent waiver granted by Leeds  
542 West NHS Research Ethics Committee (ref: 20/YH/0152). Inclusion criteria were ‘adult (age >16)  
543 patients admitted to ICU for mechanical ventilation undergoing bronchoalveolar lavage for the  
544 investigation of suspected pneumonia’. Exclusion criteria were non-ventilated patients, age <16  
545 years, and patients with restricted access to notes. For blood samples, ethical approval was  
546 obtained from the East of England – Cambridge Central Research Ethics Committee (“NIHR  
547 BioResource” REC ref 17/EE/0025, and “Genetic variation AND Altered Leukocyte Function in  
548 health and disease - GANDALF” REC ref 08/H0308/176). All participants provided informed  
549 consent. For paediatric nasal brushings, BMI data was obtained (where possible) on patients  
550 included in the UK Cohort of Yoshida *et al.* 2021<sup>22</sup>. Details of consent and methodology are found  
551 here.

552

### 553 **Isolation of the cells from BALF**

554 Samples of 5-20ml BAL were collected and processed under BSL3 conditions. If necessary, the  
555 samples were filtered prior to processing by passing through a 100µm cell strainer to remove large  
556 mucus aggregates. Samples were subsequently topped up with PBS to 50ml and centrifuged at  
557 400xg for 5 min. The supernatant was removed, and the cells were resuspended in 100µl of PBS.  
558 20µl of Human fc block was added (Milteni) followed by 10µl of a custom TotalSeq -C Human  
559 cocktail. Cells were stained for 30min, topped up with PBS and washed as before.

560

### 561 **Single-cell encapsulation, library preparation, and sequencing**

562 Cells were resuspended in 50µl, counted, and loaded on Chromium Chip A (10x Genomics, 5’v3)  
563 for cell encapsulation. cDNA libraries were prepared per manufacturer’s recommendation. After  
564 quality checks with Bioanalyzer (Agilent; 2100), the libraries were pooled and sequenced with  
565 NovaSeq 6000.

566

### 567 **Isolation of PBMCs and granulocytes.**

568 PBMC and granulocytes were isolated by discontinuous density gradient centrifugation in 60%  
569 and 80% Percoll at 800g for 15 minutes. PBMC and granulocyte layers were taken off and washed  
570 separately in PBS at 300xg for 10 minutes. Cells were counted and 1-3x10<sup>6</sup> cells from each of the  
571 PBMC and granulocyte layers were separately stained for flow cytometry.

572

### 573 **Flow cytometry.**

574 After aliquots were taken for single-cell RNA sequencing, remaining BAL fluid cells, PBMC and  
575 granulocytes were blocked with human FcR block (Miltenyi Biotech, Bisley, UK) and incubated  
576 with antibodies (see table) for 30 minutes at 4°C, then washed in PBS and resuspended in FACS  
577 fix. Samples were processed on a Fortessa flow cytometer (Becton Dickinson, Basel, Switzerland)  
578 and data analysed using Flowjo version 10.

579

580

Table 1. List of antibodies used in flow cytometry

| Marker    | Fluorophore  | Clone    | Company                  | Cat. No.   |
|-----------|--------------|----------|--------------------------|------------|
| CD4       | FITC         | RPA-T4   | Thermo Fisher Scientific | 11-0049-42 |
| CD24      | PerCPy5.5    | ML5      | Biolegend                | 311106     |
| CD64      | APC          | 10.1     | Thermo Fisher Scientific | 17-0649-42 |
| CD3       | AF700        | UCHT1    | Biolegend                | 300424     |
| CD19      | APC-Cy7      | SJ25-C1  | Thermo Fisher Scientific | A15429     |
| CD14      | Pacific blue | 61D3     | Thermo Fisher Scientific | 48-0149-42 |
| Live/Dead | Aqua         | NA       | Thermo Fisher Scientific | L34957     |
| CD11c     | BV605        | 3.9      | Biolegend                | 301636     |
| CD45      | BV650        | HI30     | Biolegend                | 304044     |
| CD56      | BV785        | 5.1H11   | Biolegend                | 362550     |
| CD206     | PE           | 19.2     | Thermo Fisher Scientific | 12-2069-42 |
| CD16      | PE-Cy7       | eBioCB16 | Thermo Fisher Scientific | 25-0168-42 |

581

## 582 **Public datasets.**

583 We have included two public single-cell RNA-seq datasets from Liao et al. (2020)<sup>18</sup> and Grant et  
584 al. (2021)<sup>19</sup> for multi-sample integration. The data were acquired from Gene Expression Omnibus  
585 (GEO) database under accession codes GSE145926 and GSE155249, respectively. The  
586 additional healthy control BAL sample (Morse et al., 2019; GSE128033)<sup>30</sup> analyzed in Liao et al.  
587 (2020)<sup>18</sup> has also been included.

588

## 589 **Single-cell RNA-seq data alignment and multi-sample integration.**

590 Data were processed using the Cell Ranger 3.1.0 pipeline (10x Genomics). The generated count  
591 tables with UMI counts > 1000, gene number > 200, and mitochondrial genes < 10% were  
592 analysed using the Seurat<sup>31</sup> software package (4.0.4) in R (4.0), ambient RNA was corrected with  
593 SoupX<sup>32</sup> (1.5.2), doublets were detected with DoubletFinder<sup>33</sup> (2.0.3) and removed, and multi-  
594 sample integration was performed with harmony<sup>34</sup> (1.0) to remove batch effects across different  
595 patients. In parameter settings, the first 50 dimensions of principal-component analysis (PCA)  
596 were used, and the cells were clustered using the FindClusters function with a resolution of 0.5.  
597 Uniform Manifold Approximation and Projection (UMAP)<sup>35</sup> v(0.5.2) was used for visualizing the  
598 data.

599

## 600 **Differential gene expression analysis**

601 Wilcox test in FindAllMarkers or FindMarkers function in Seurat was used to compare the  
602 differential gene expression across major or minor cell types or within each subpopulation of  
603 structural cells, macrophages, T/NK cells, B/Plasma cells, or dendritic cells between non-obese  
604 and obese cases, respectively.

605

## 606 **Re-integration of structural cells, macrophages, T / NK cells, and B cells.**

607 Major cell types including structural cells, macrophages, T / NK cells, and B cells were re-clustered  
608 with Seurat (4.0.4), followed by removal of batch effect across different patients with harmony  
609 (1.0). Cells were clustered using the FindClusters function with resolutions between 0.4-1.0  
610 (structural cells: 0.5; myeloid cells: 0.4; T cells: 1.0; B cells: 1.0).

611

## 612 **Gene set enrichment analysis (GSEA)**

613 clusterProfiler<sup>36</sup> (3.18.1) was used to perform GSEA. Briefly, genes from each of the  
614 subpopulations were ranked in a descending order of their expression levels between non-obese  
615 and obese cases by using FindMarker function. Those with log fold changes  $> 0.5$  or  $< -0.5$  were  
616 selected for GSEA using compareCluster function. Hallmark gene sets in msigdb (7.4.1) and  
617 enricher function in clusterProfiler were used for gene functional annotation.

618

## 619 **Calculation of the cytokine module score**

620 The module score was calculated using AddModuleScore function in Seurat with the cytokine and  
621 chemokine gene set from KEGG pathway.

622

## 623 **Ligand-receptor analysis**

624 Ligand-receptor analysis was performed with CellPhoneDB<sup>37</sup> and was visualized with ktplots using  
625 plot\_cpdb function. Briefly, the normalized counts and meta data extracted from Seurat objects  
626 were applied for the statistical analysis from CellPhoneDB in python 3.8.8. The resulting p values  
627 and means were then filtered and visualized with ktplots.

628

## 629 **Visualization**

630 Plotting was performed using ggplot2 (3.3.5). Heatmap was generated using pheatmap (1.0.12).  
631 Figure layouts were edited in Affinity Designer (1.10.0).

632

## 633 **Statistics**

634 Statistical analysis was performed using base R (4.0) with tidyverse (1.3.0). Wilcoxon tests were  
635 performed in FigS1a using stat\_compare\_means function in ggpubr with 'wilcox.test' indicated in  
636 method parameter

**Figure 1.**

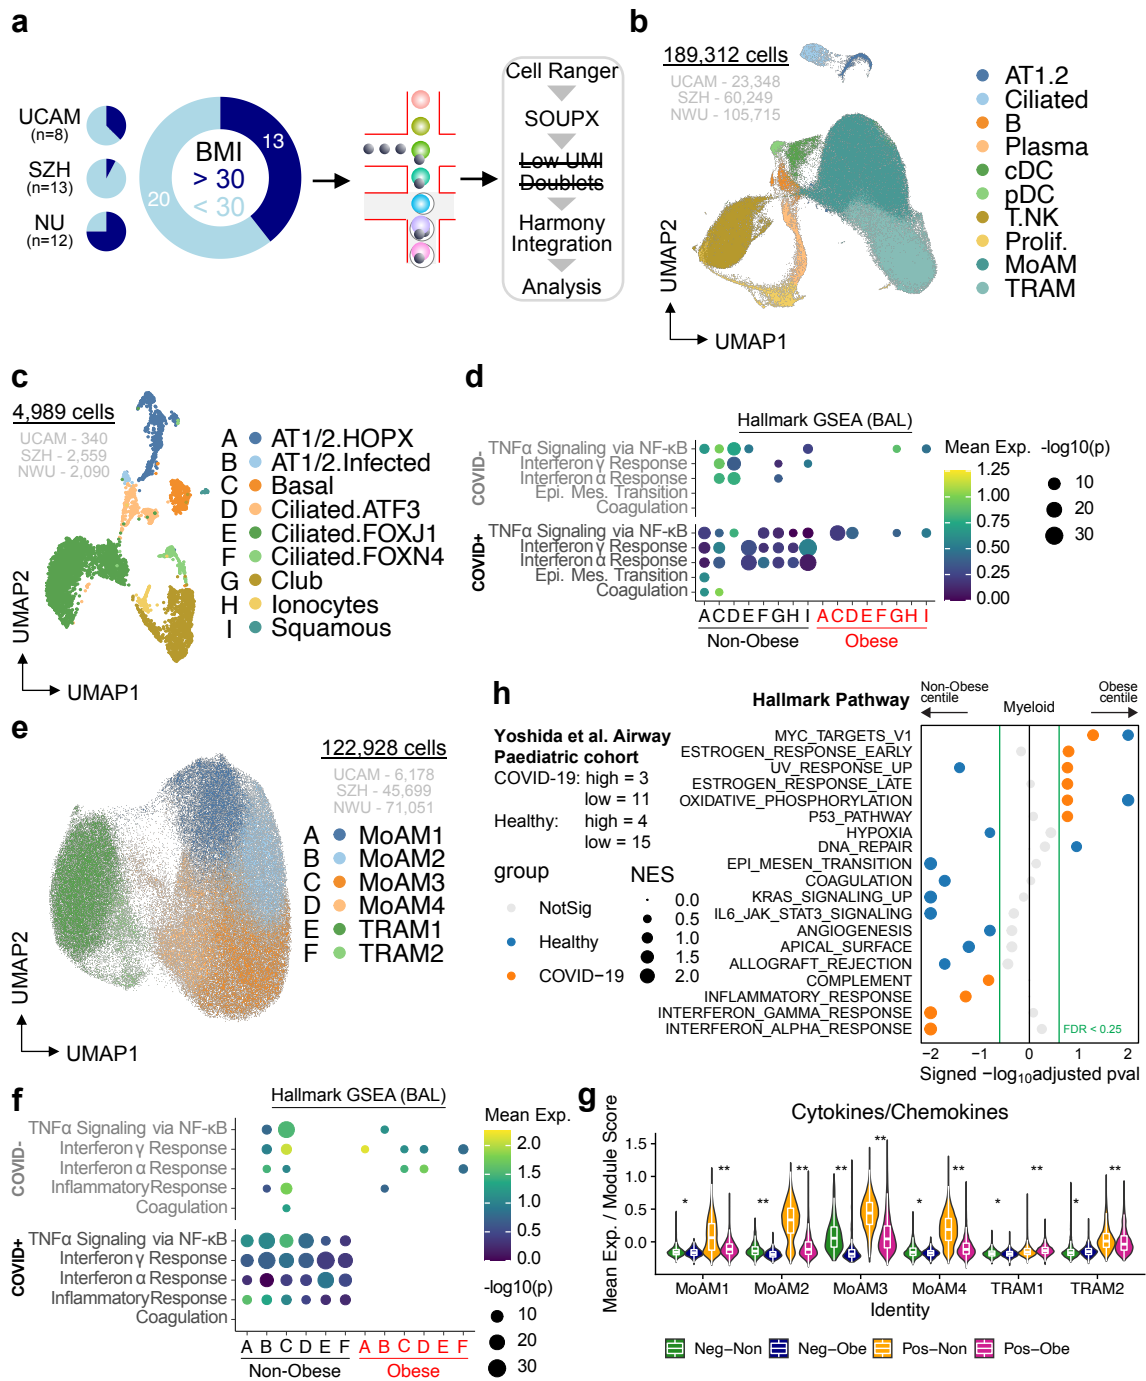



**Figure 2.**

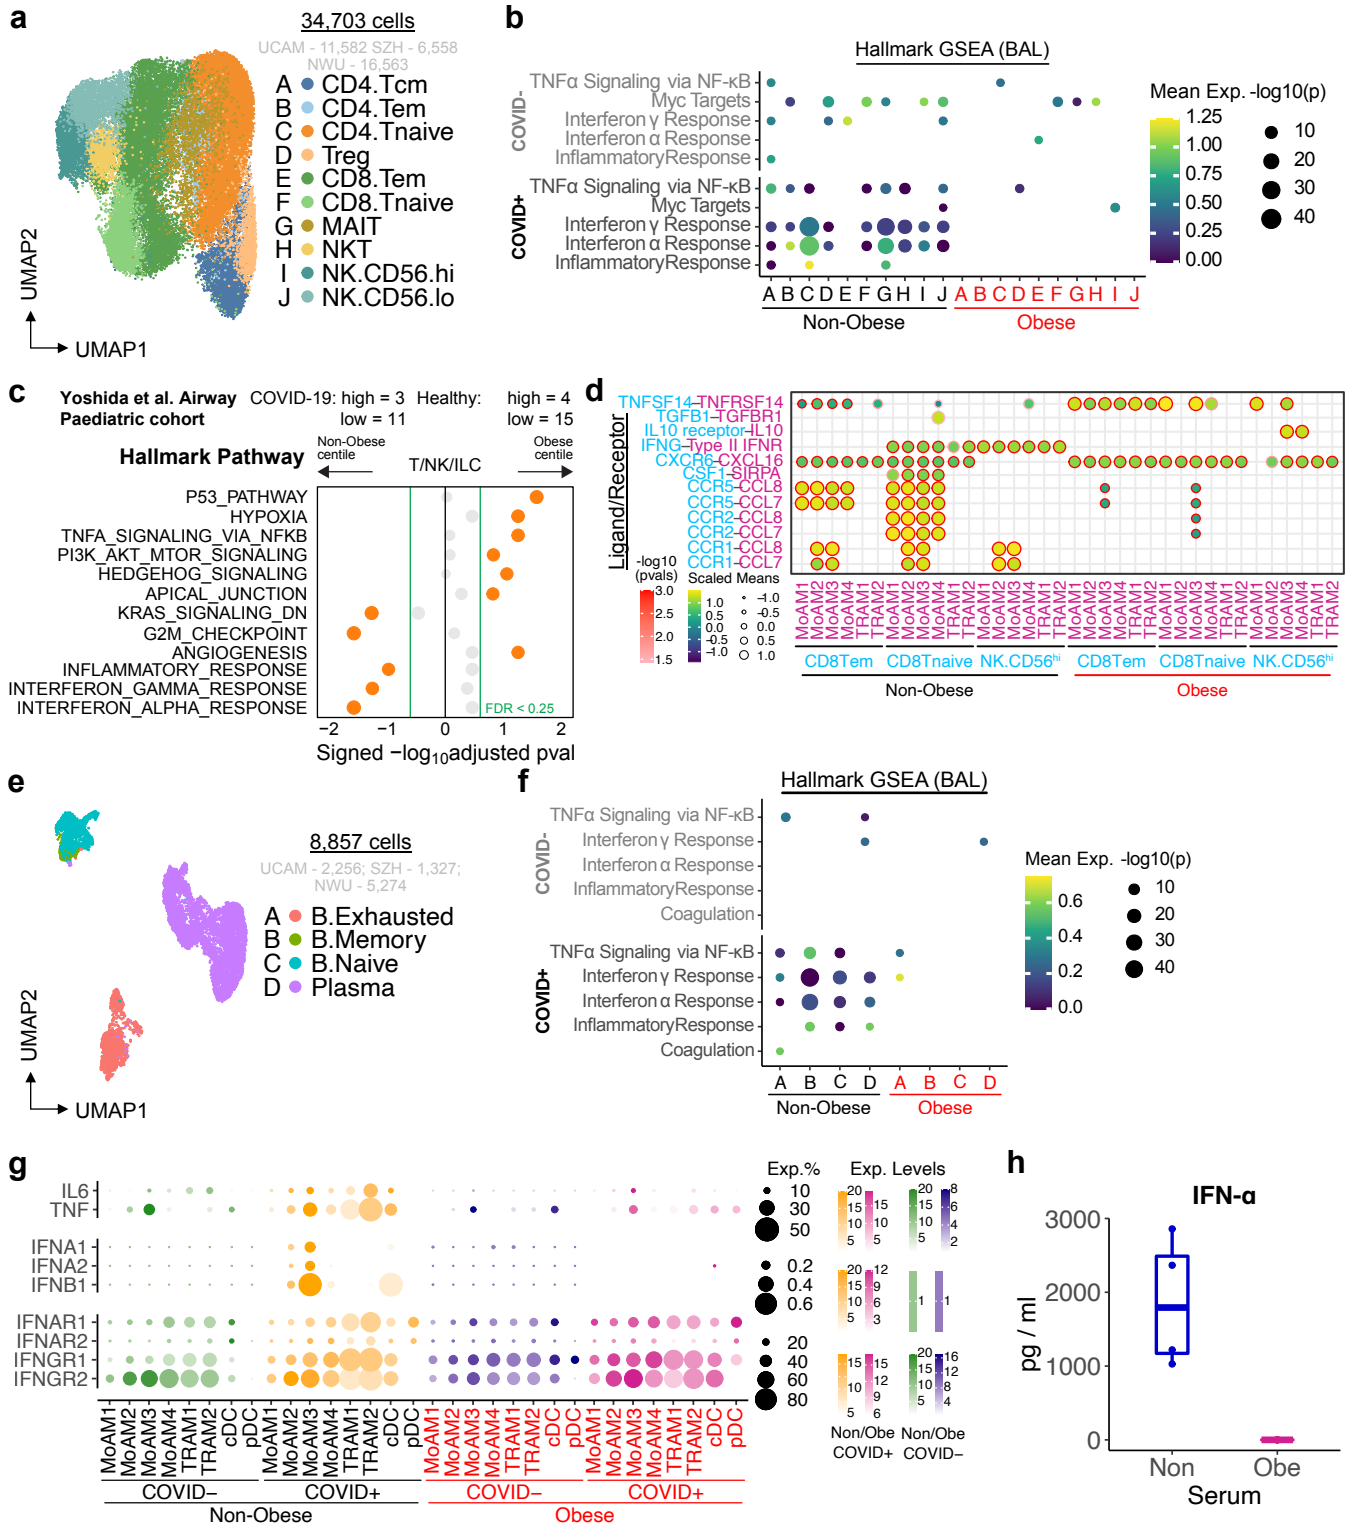

S1

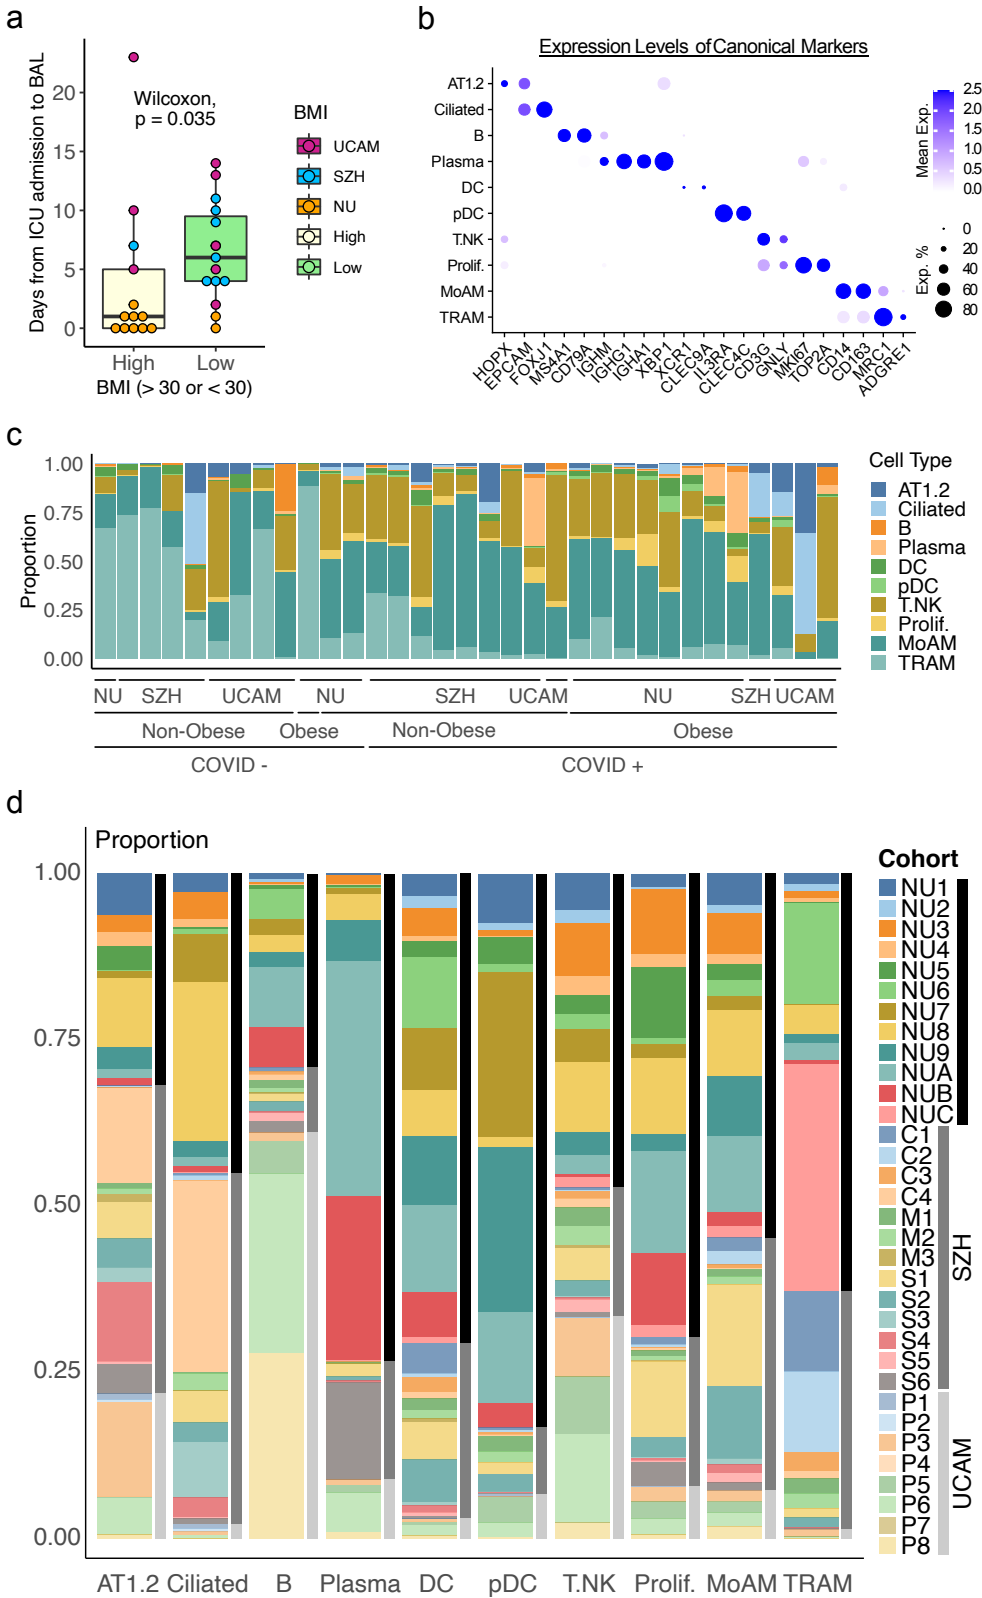

S2

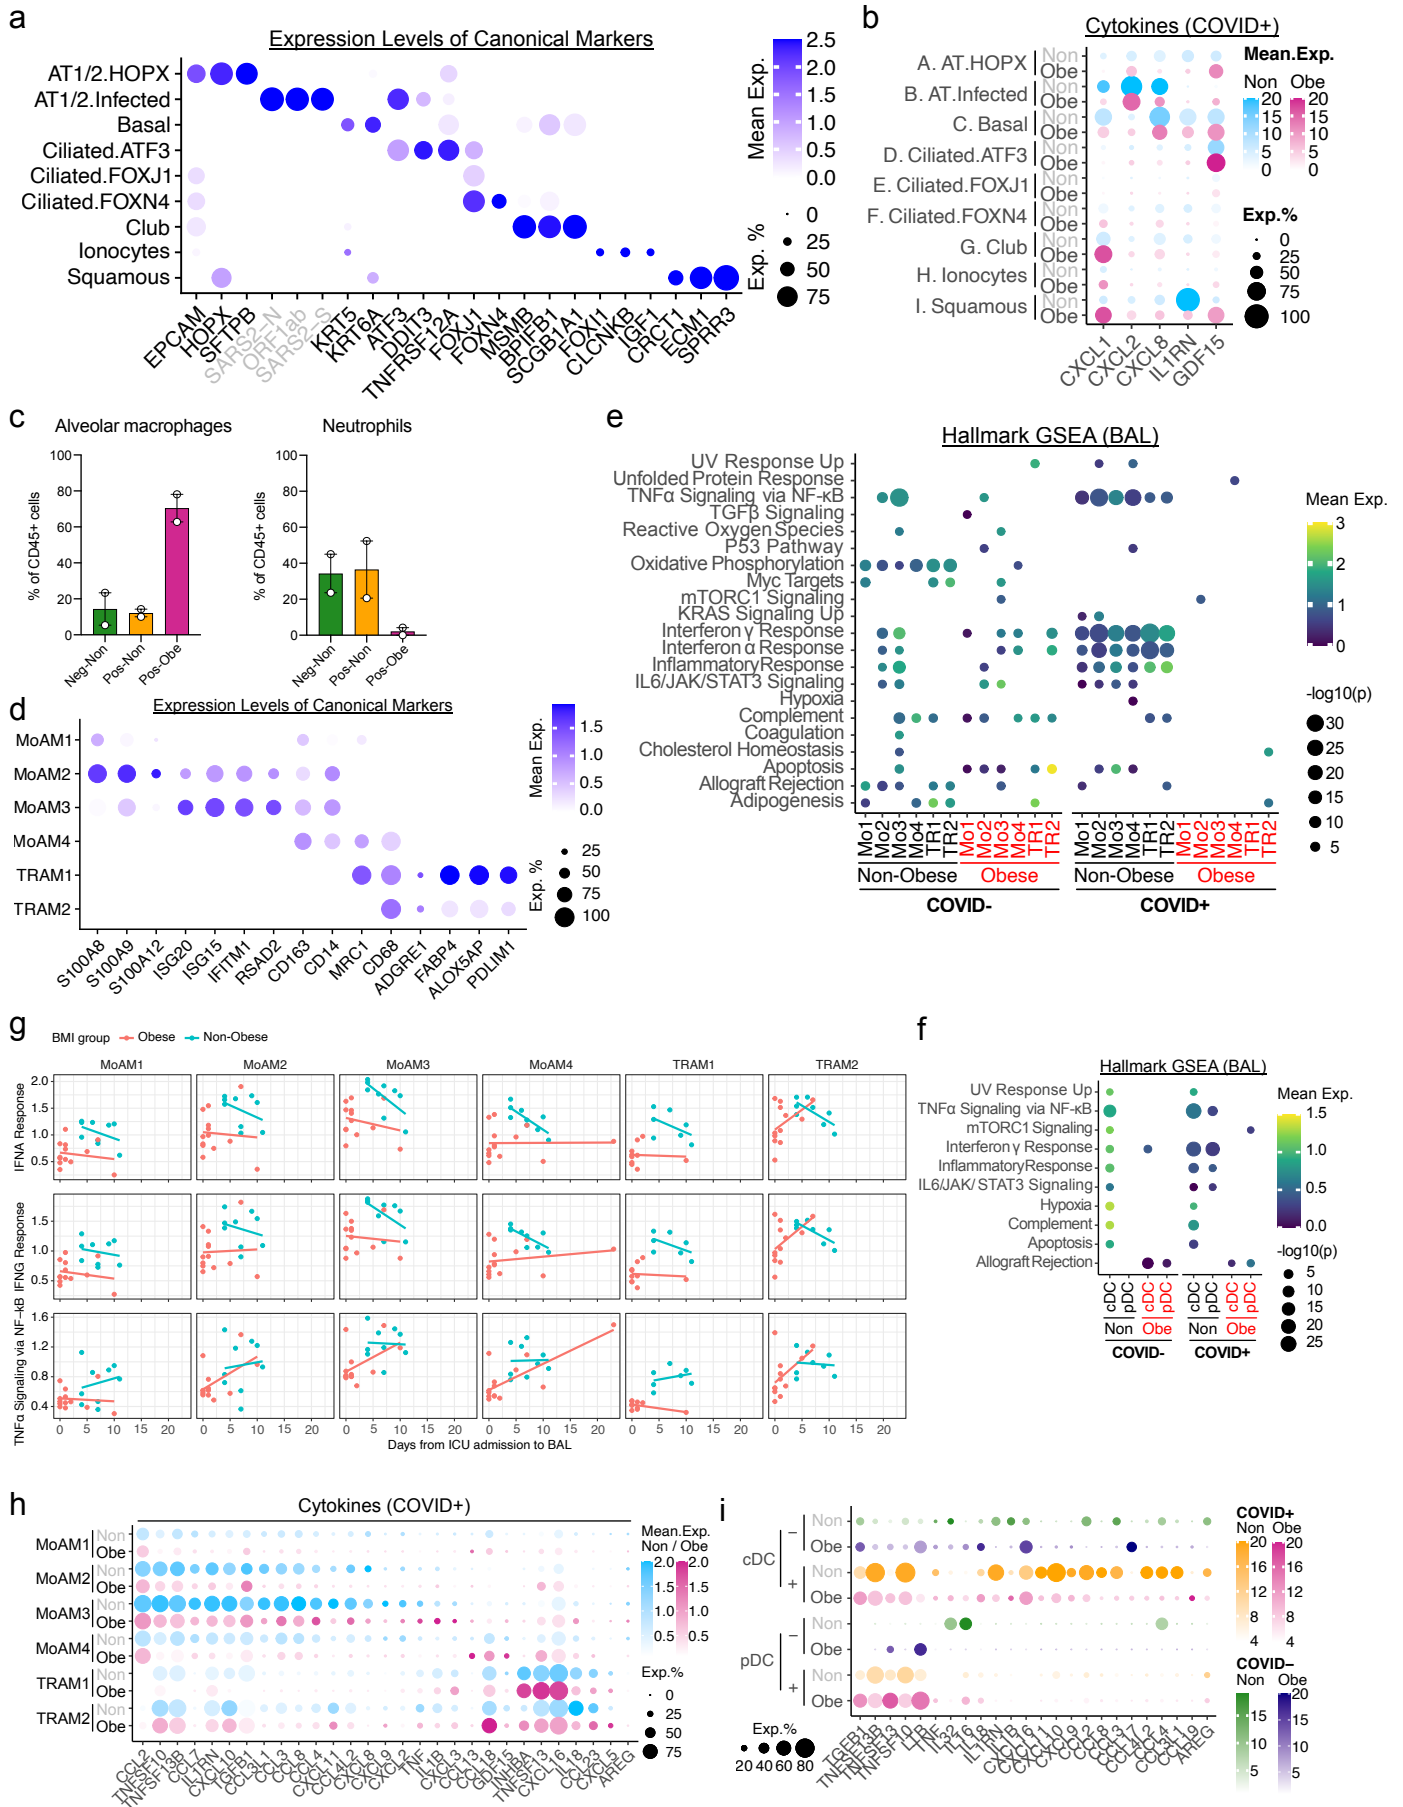

S3

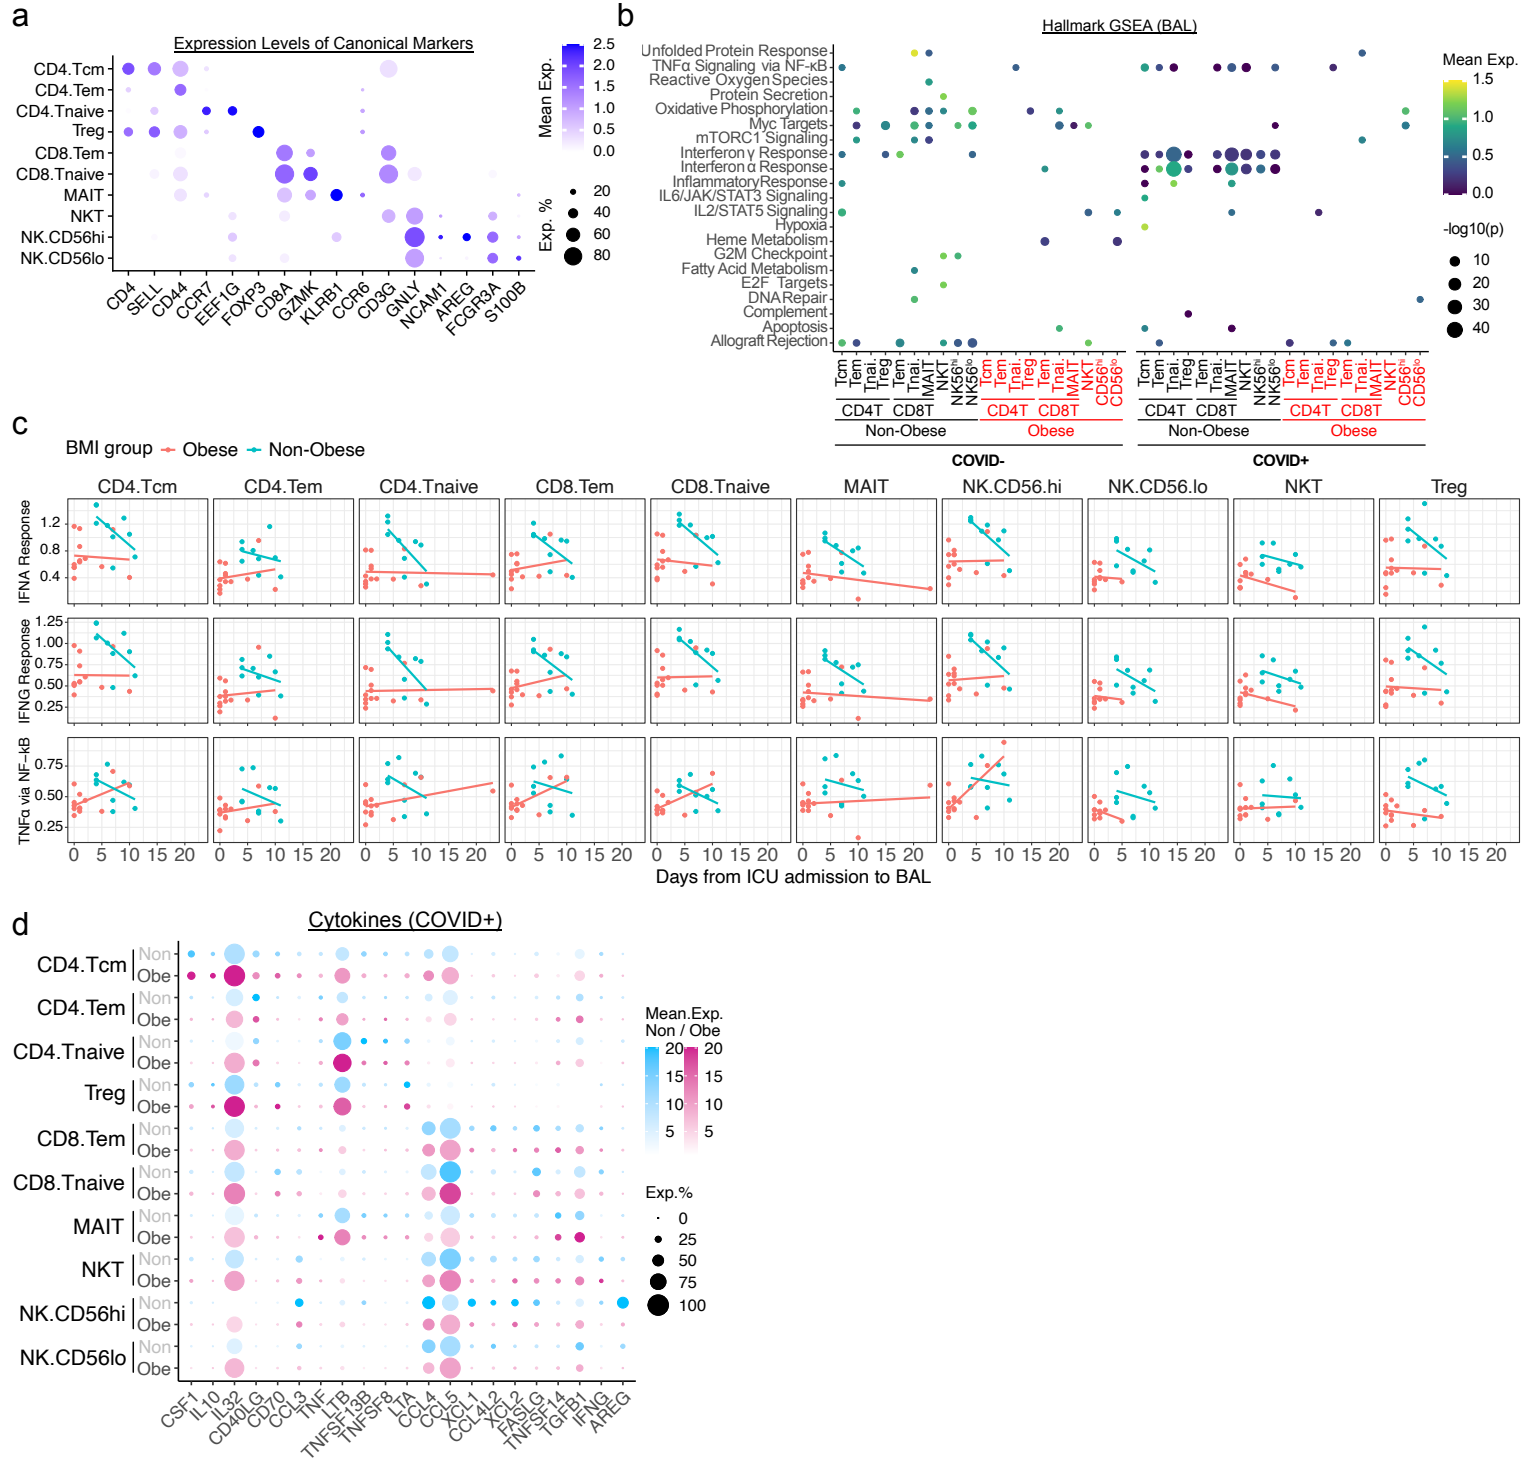

S4

**a** Expression Levels of Canonical Markers

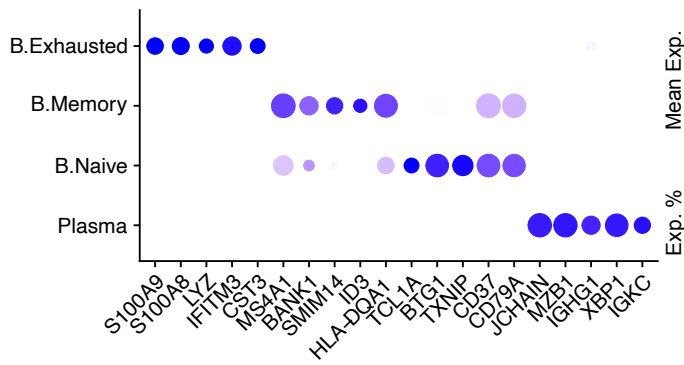

**b**

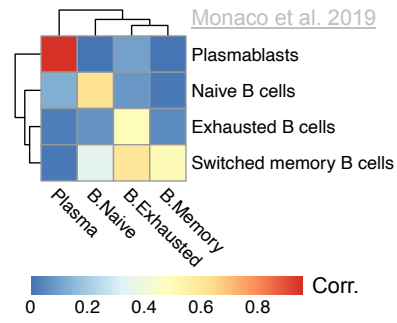

**c**

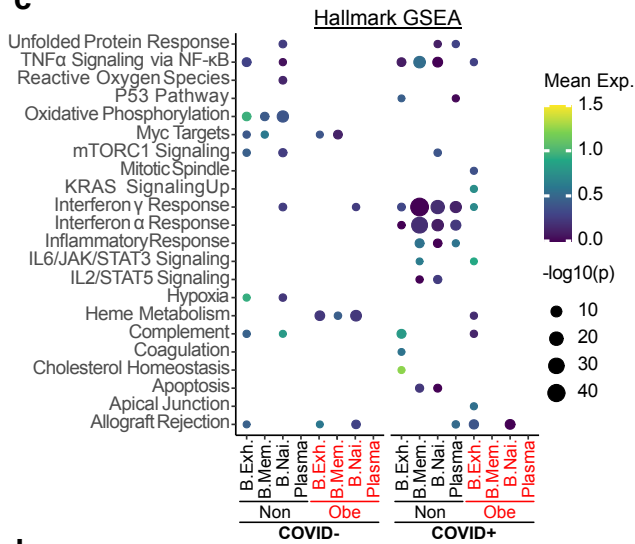

**e**

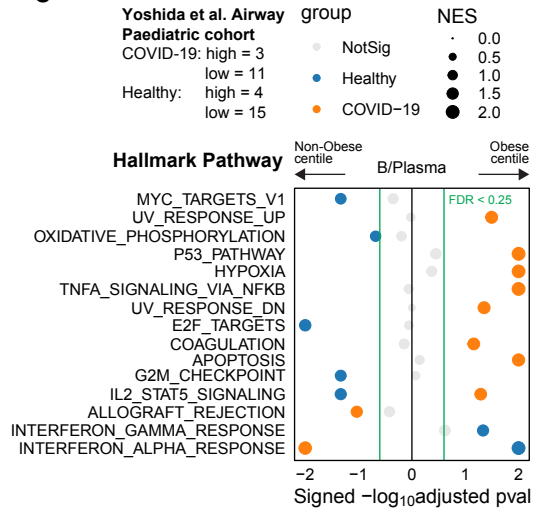

**d**

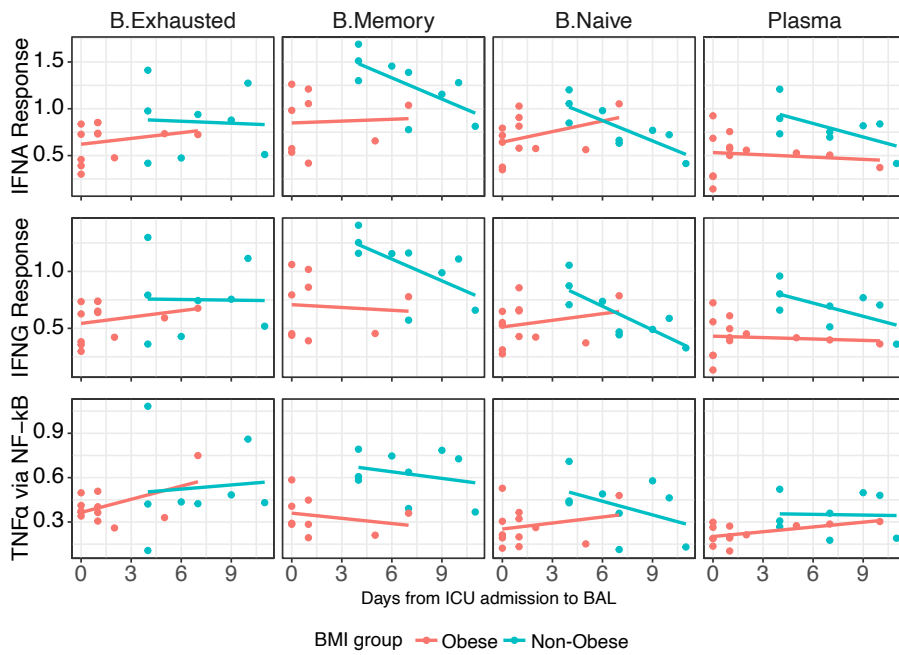



S5

a

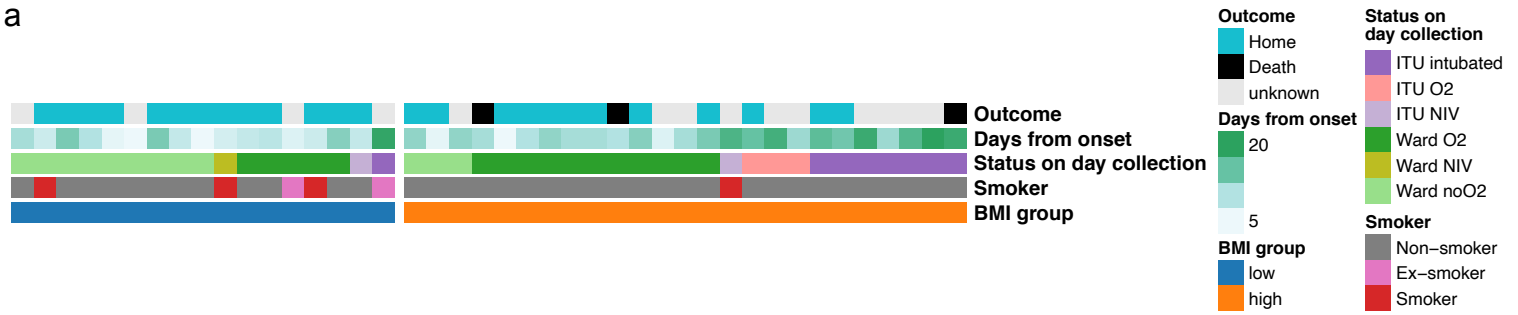

b

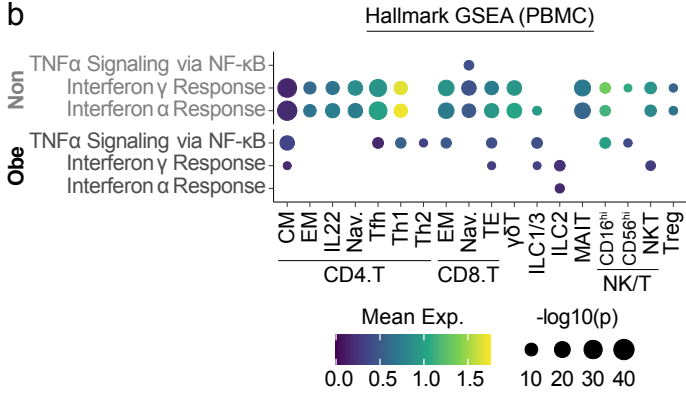

c

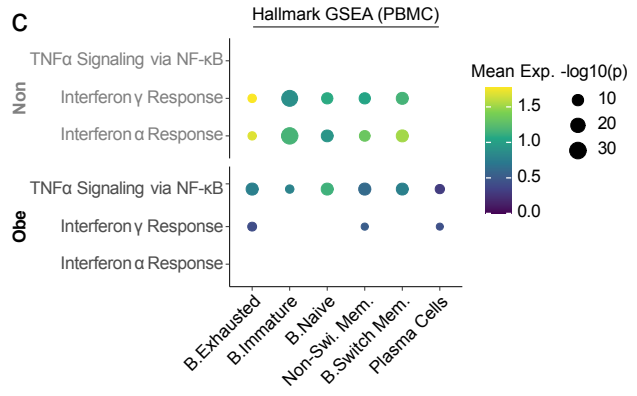

S6

a

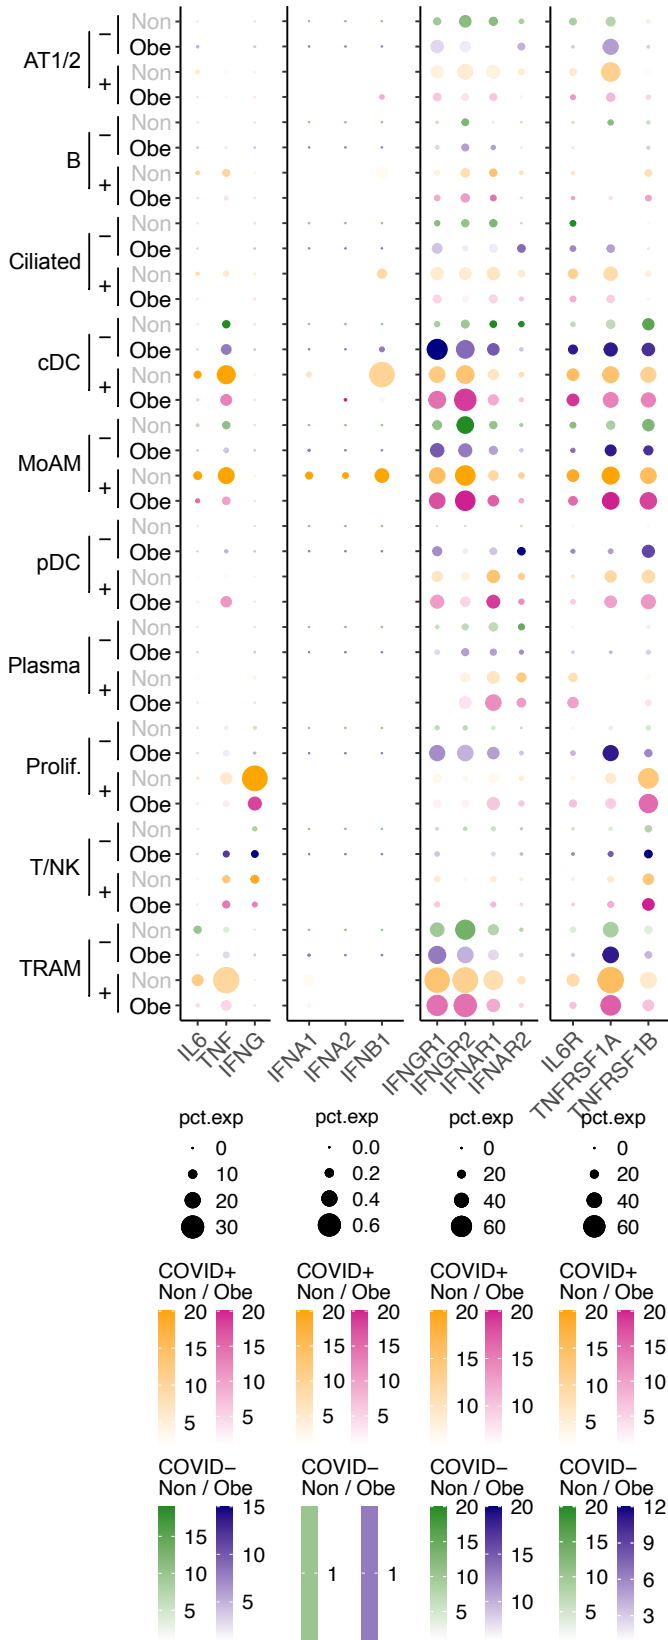

b

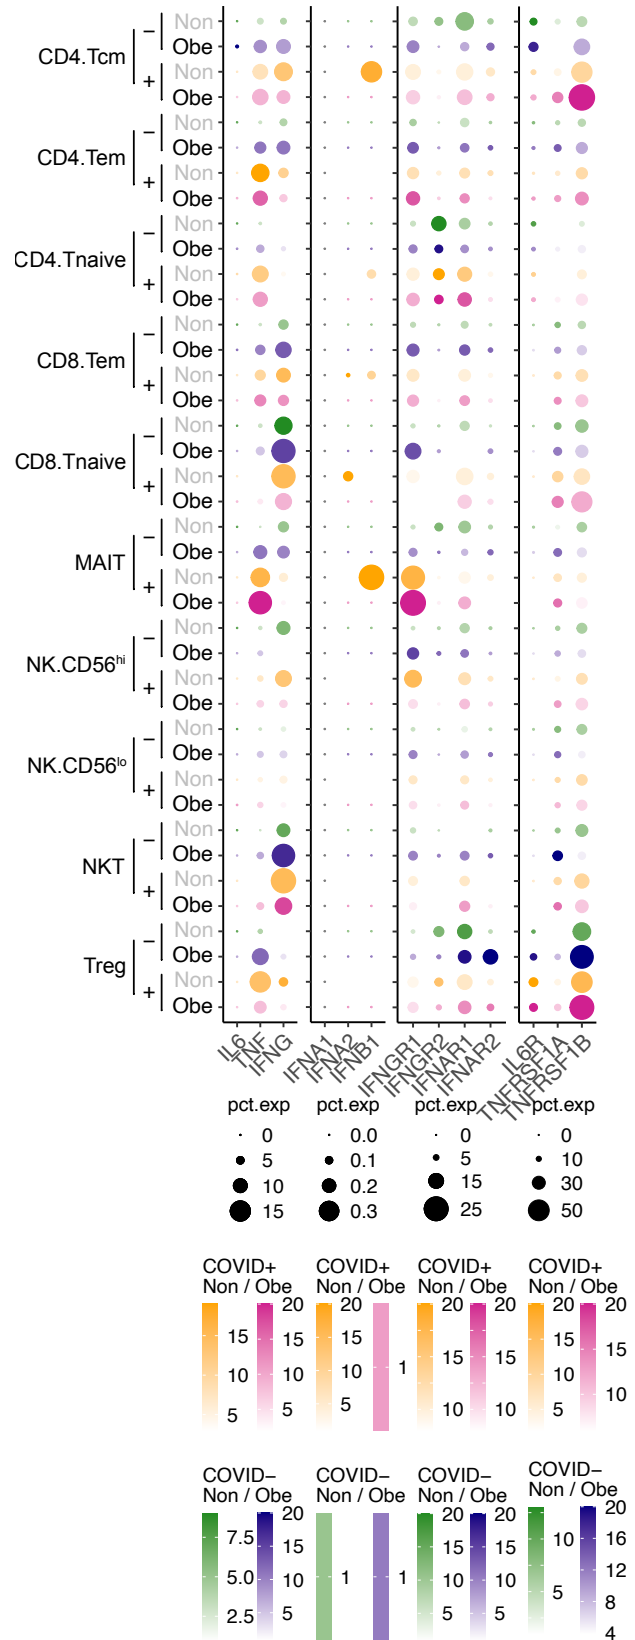

S7

a

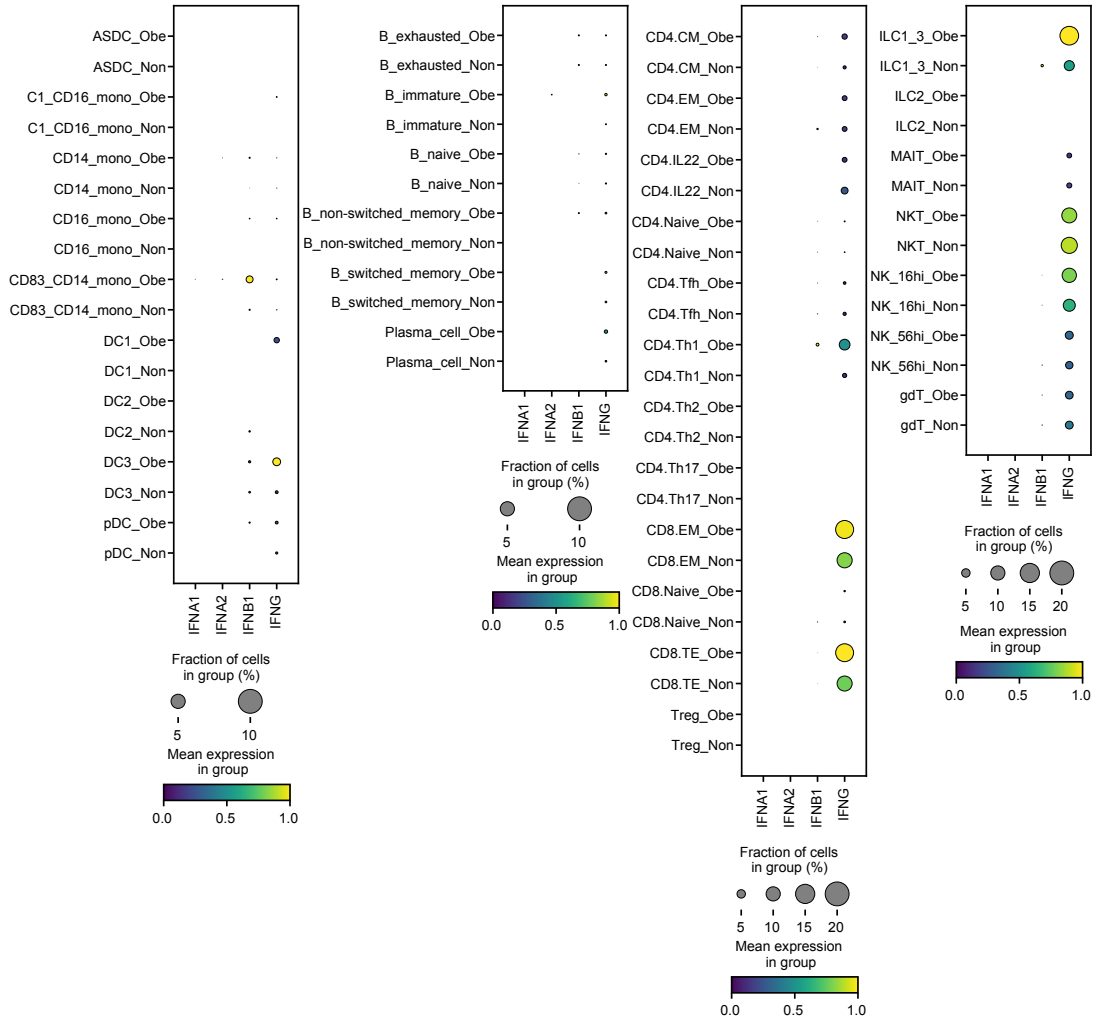

b

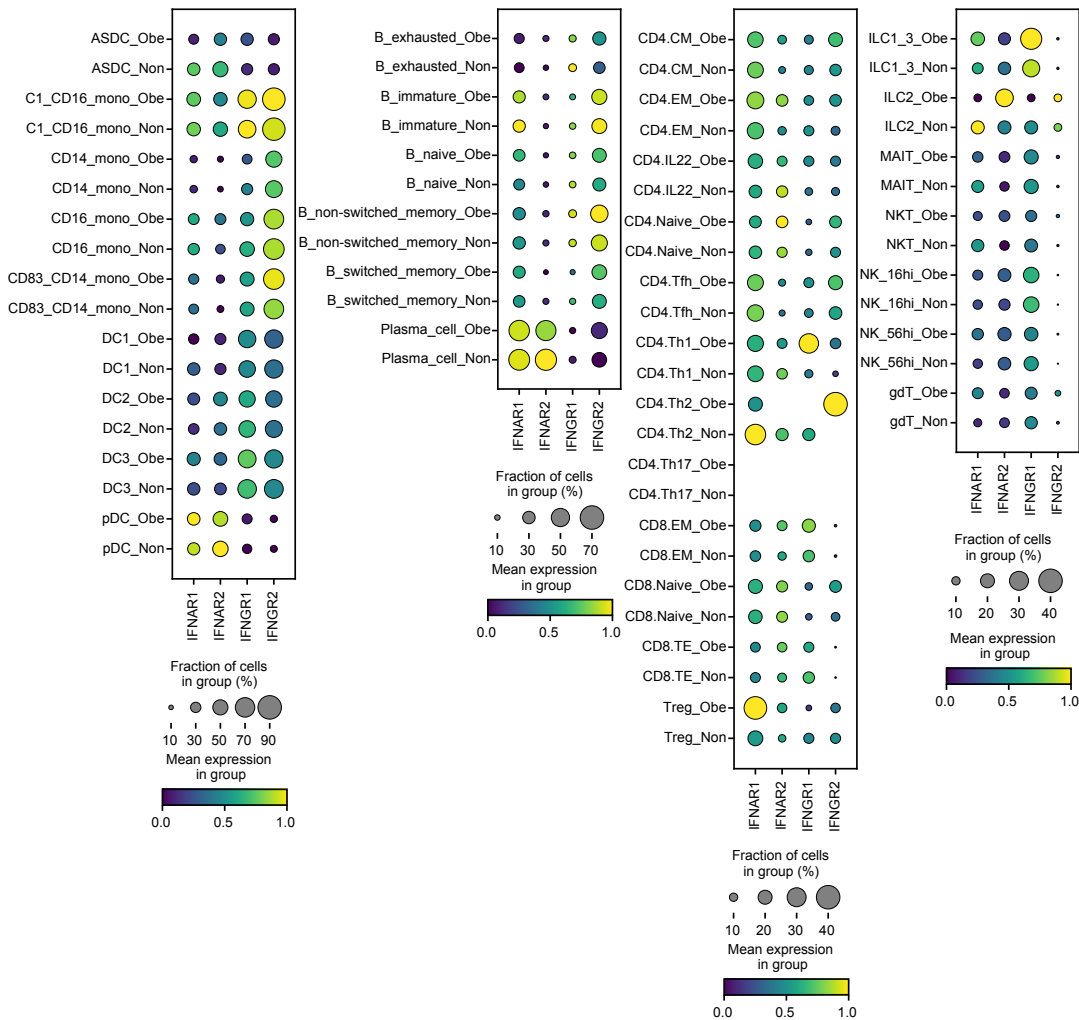

S8

**a**

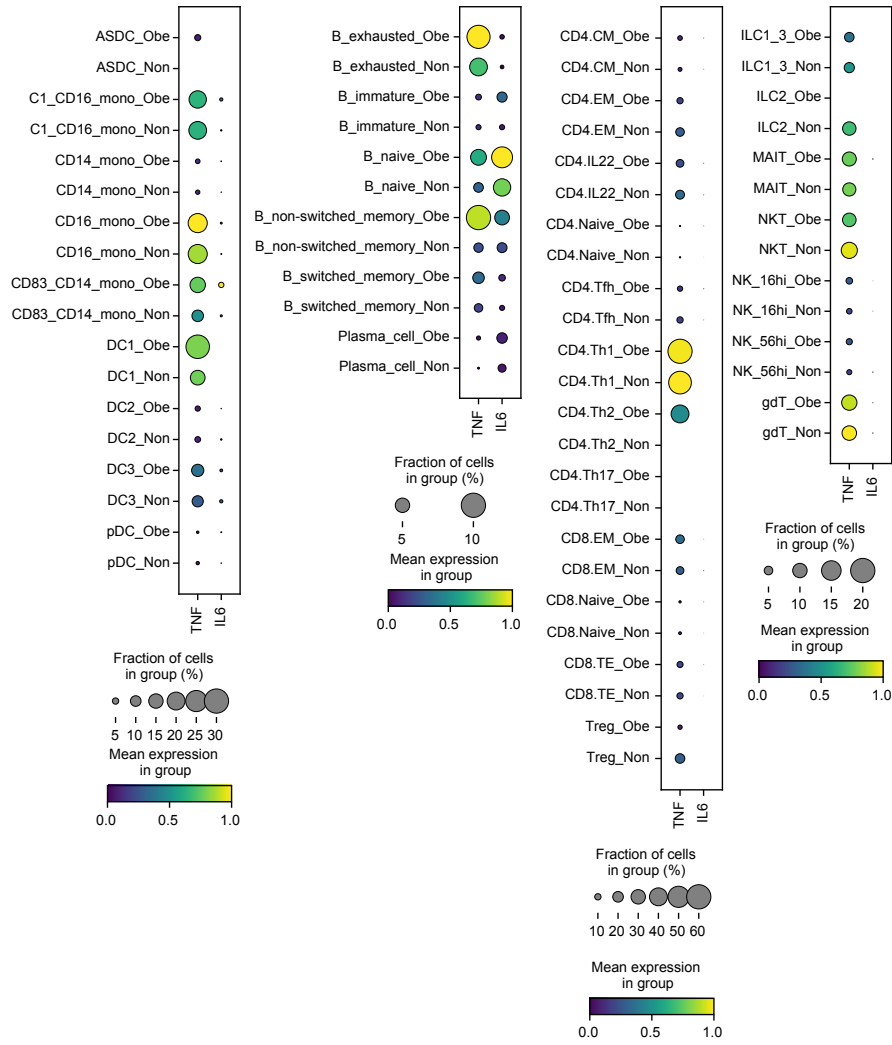

**b**

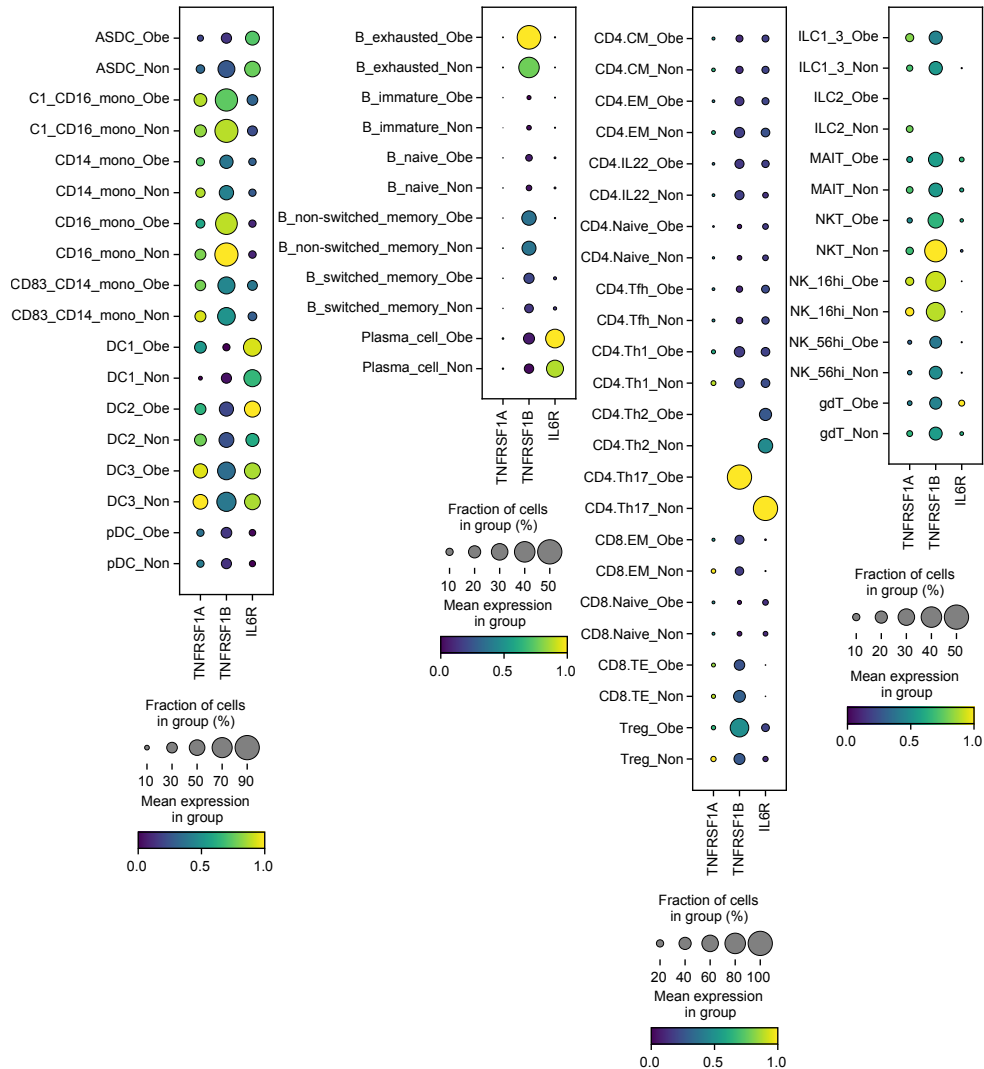

Source: http://biorxiv.org/content/10.1101/2022.01.14.475727v1.full.pdf
